# Supplementary material
Source: MDPI journal article supplement (https://www.mdpi.com/1424-8247/16/1/124)

Fig4-Bax  $\alpha$ -MMC( $\mu$ g/mL): 0-6.25-12.5-25

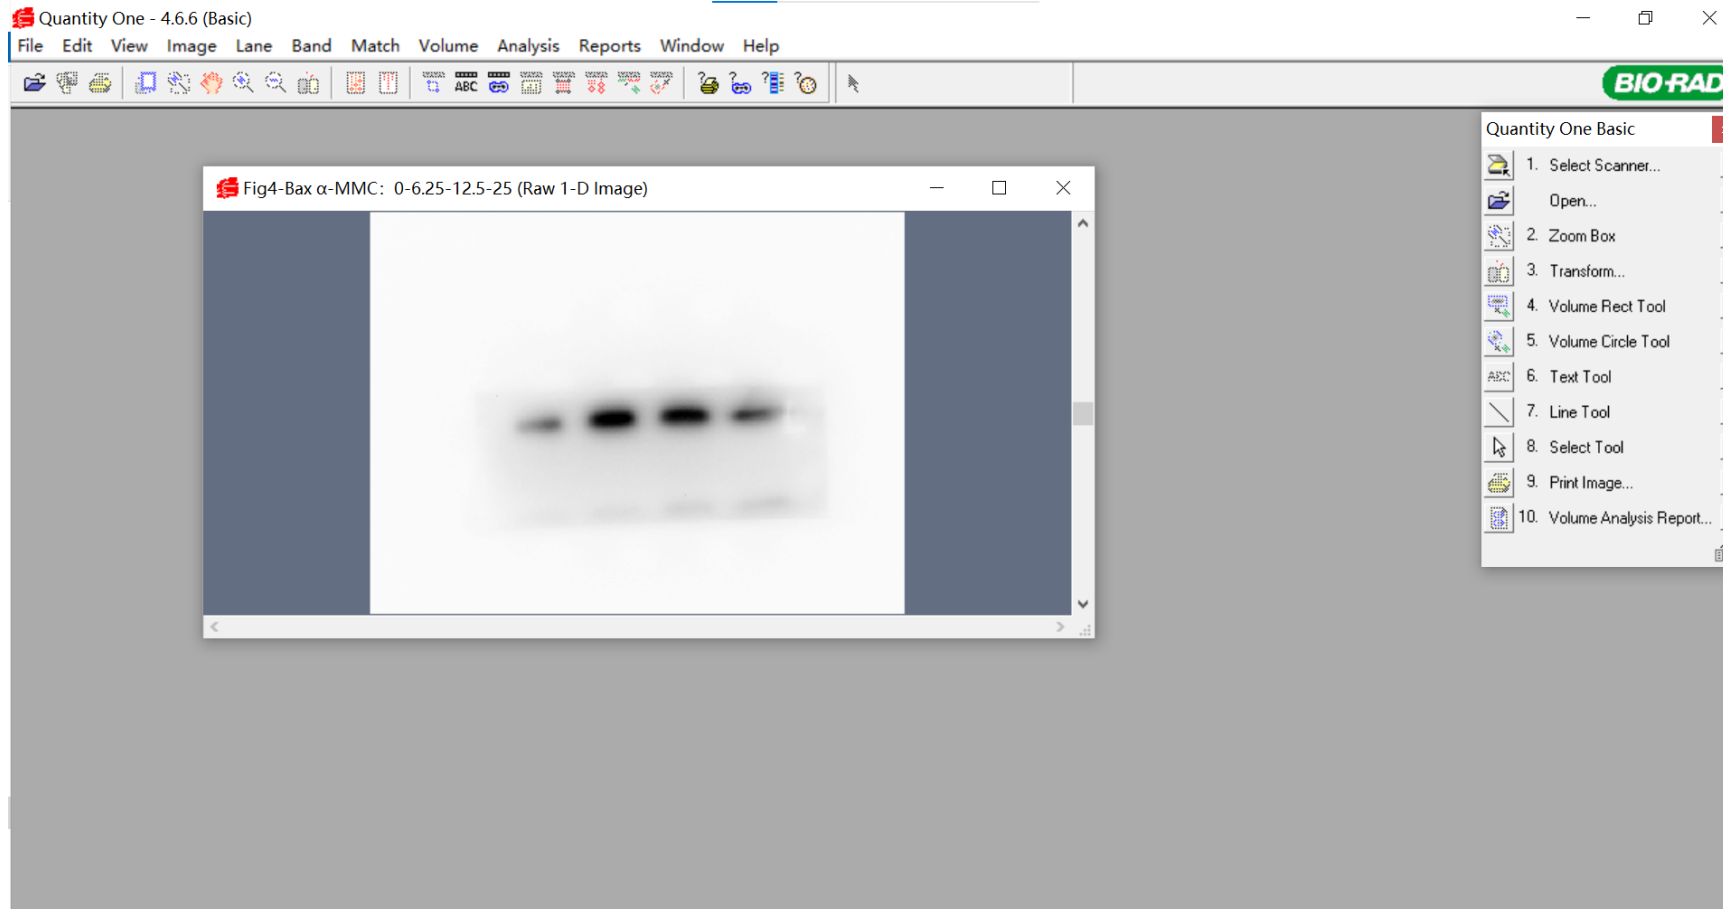

Fig4-Bid  $\alpha$ -MMC ( $\mu\text{g/mL}$ ) : 0-6.25-12.5-25

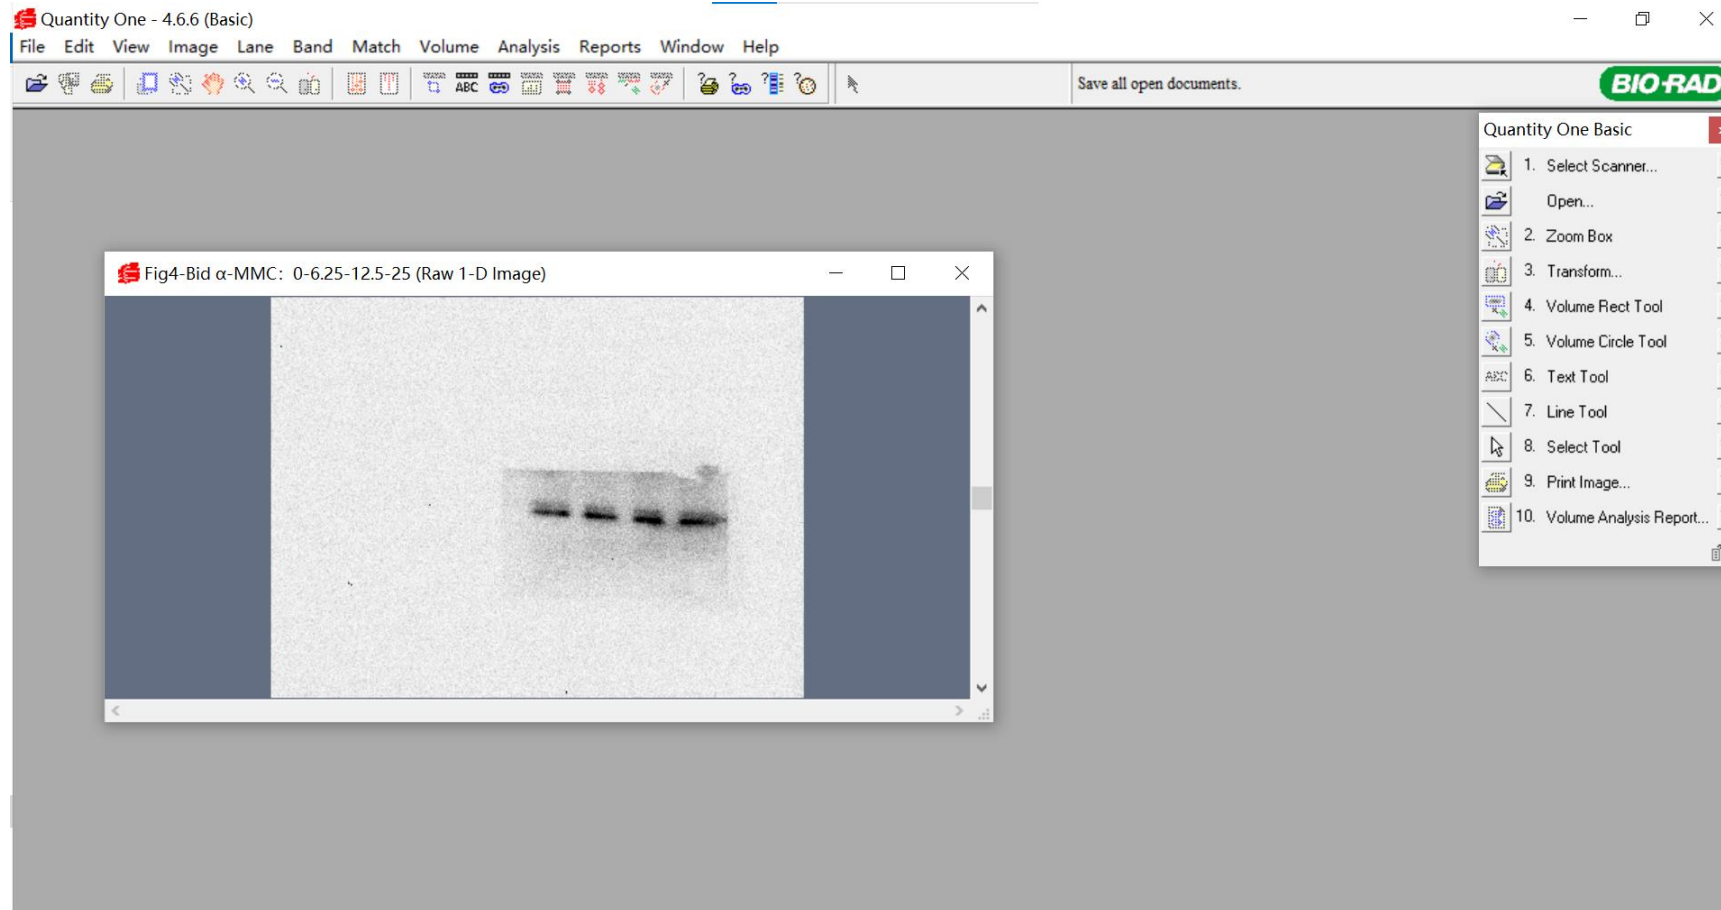

Fig4-cleaved caspase-3  $\alpha$ -MMC ( $\mu\text{g/mL}$ ) : 0-6.25-12.5-25

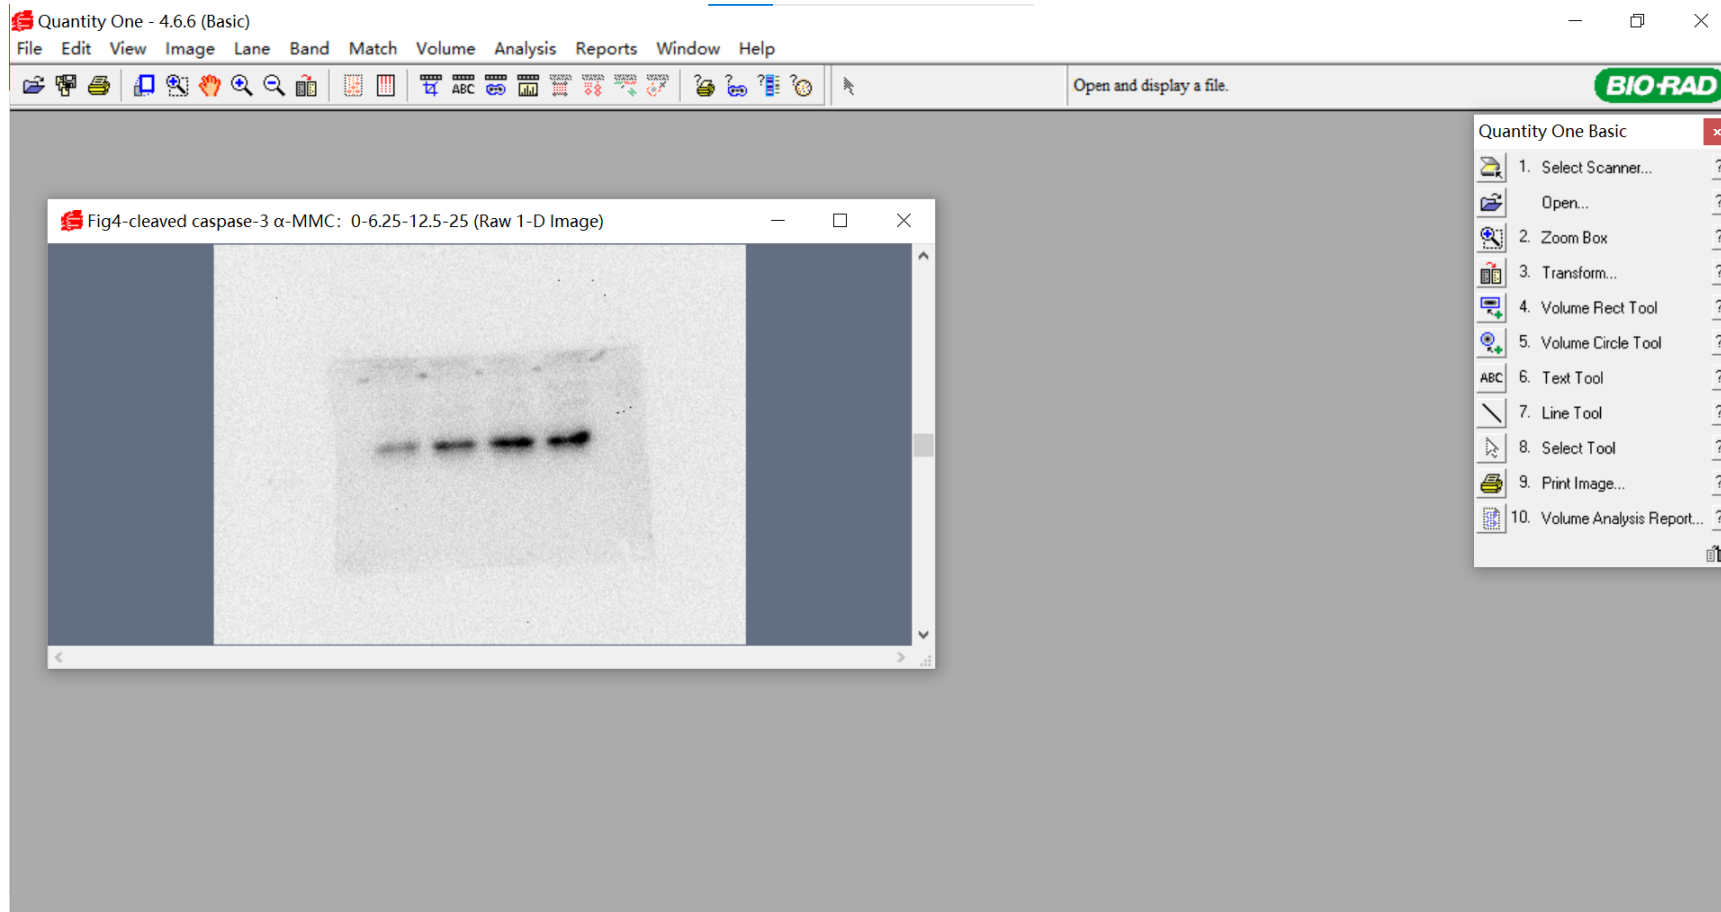

Fig4-cleaved PARP  $\alpha$ -MMC ( $\mu\text{g/mL}$ ) : 0-6.25-12.5-25

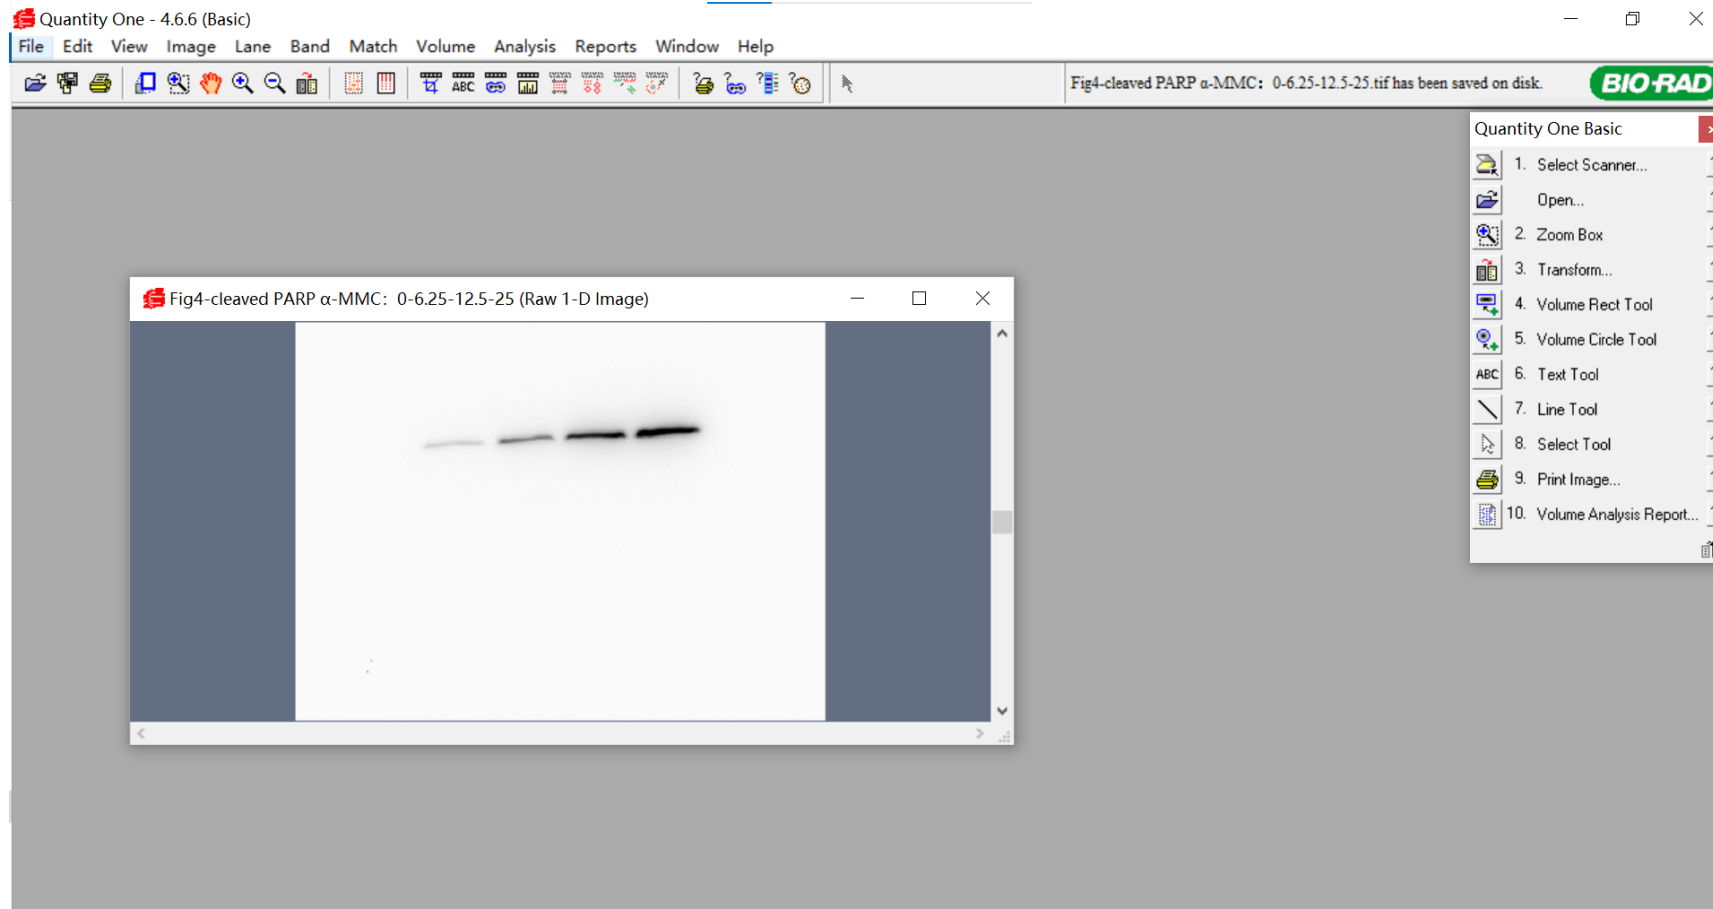

Fig4-Mcl-1  $\alpha$ -MMC ( $\mu\text{g/mL}$ ) : 0-6.25-12.5-25

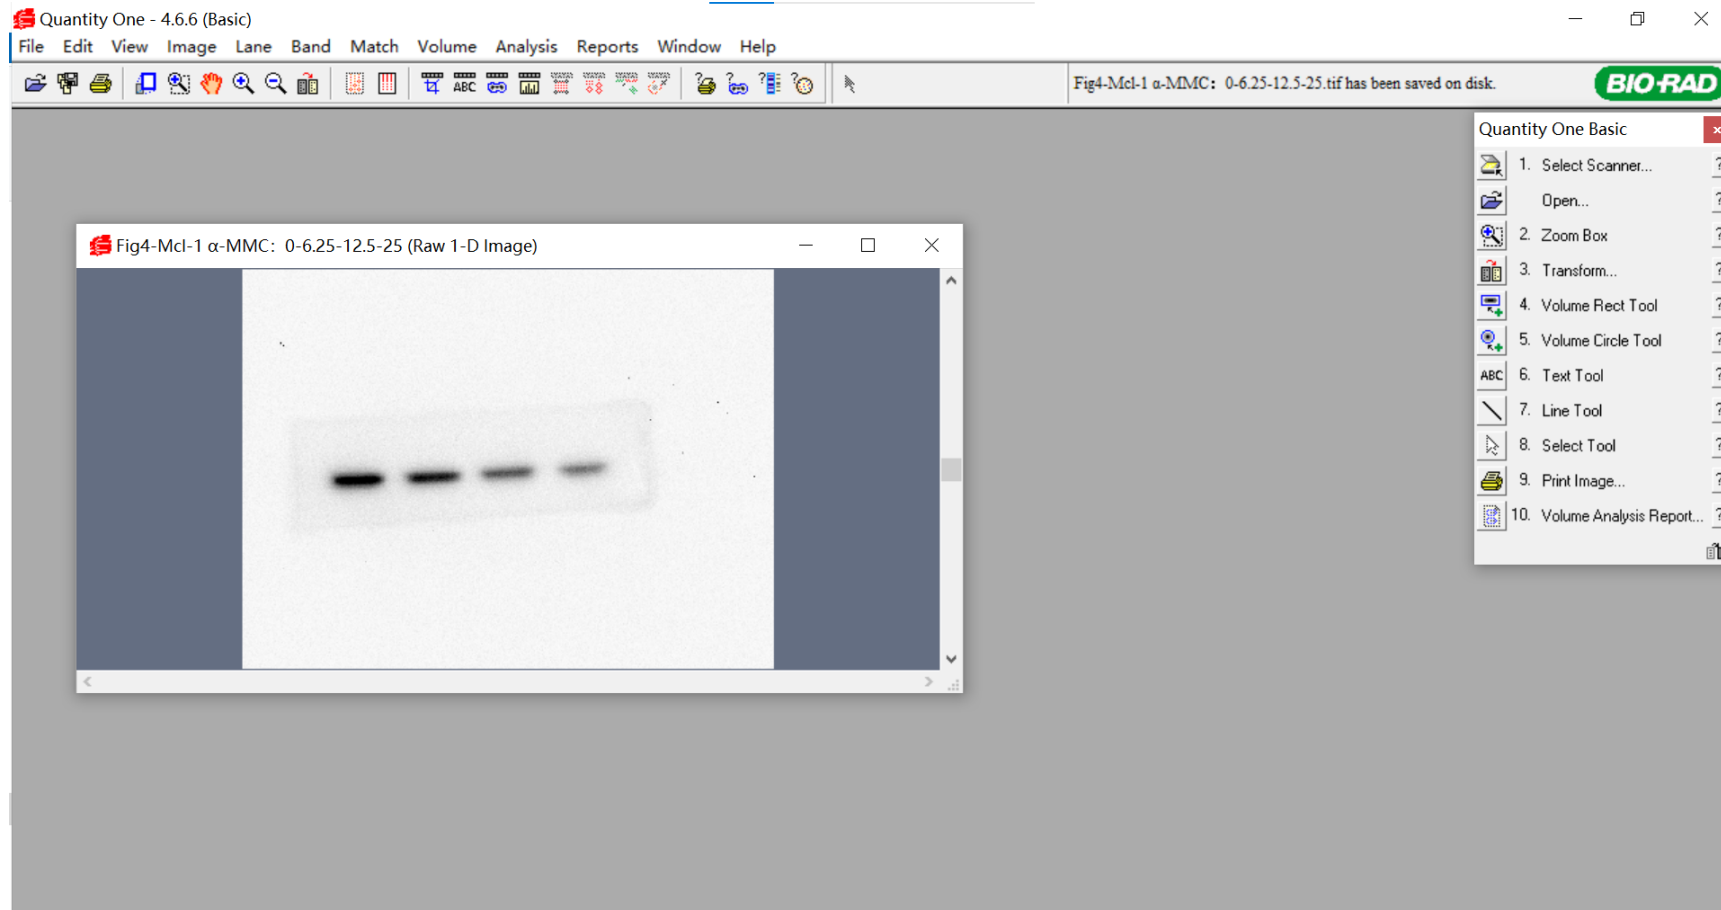

Fig5-p-ATF2  $\alpha$ -MMC ( $\mu\text{g/mL}$ ) : 0-6.25-12.5-25

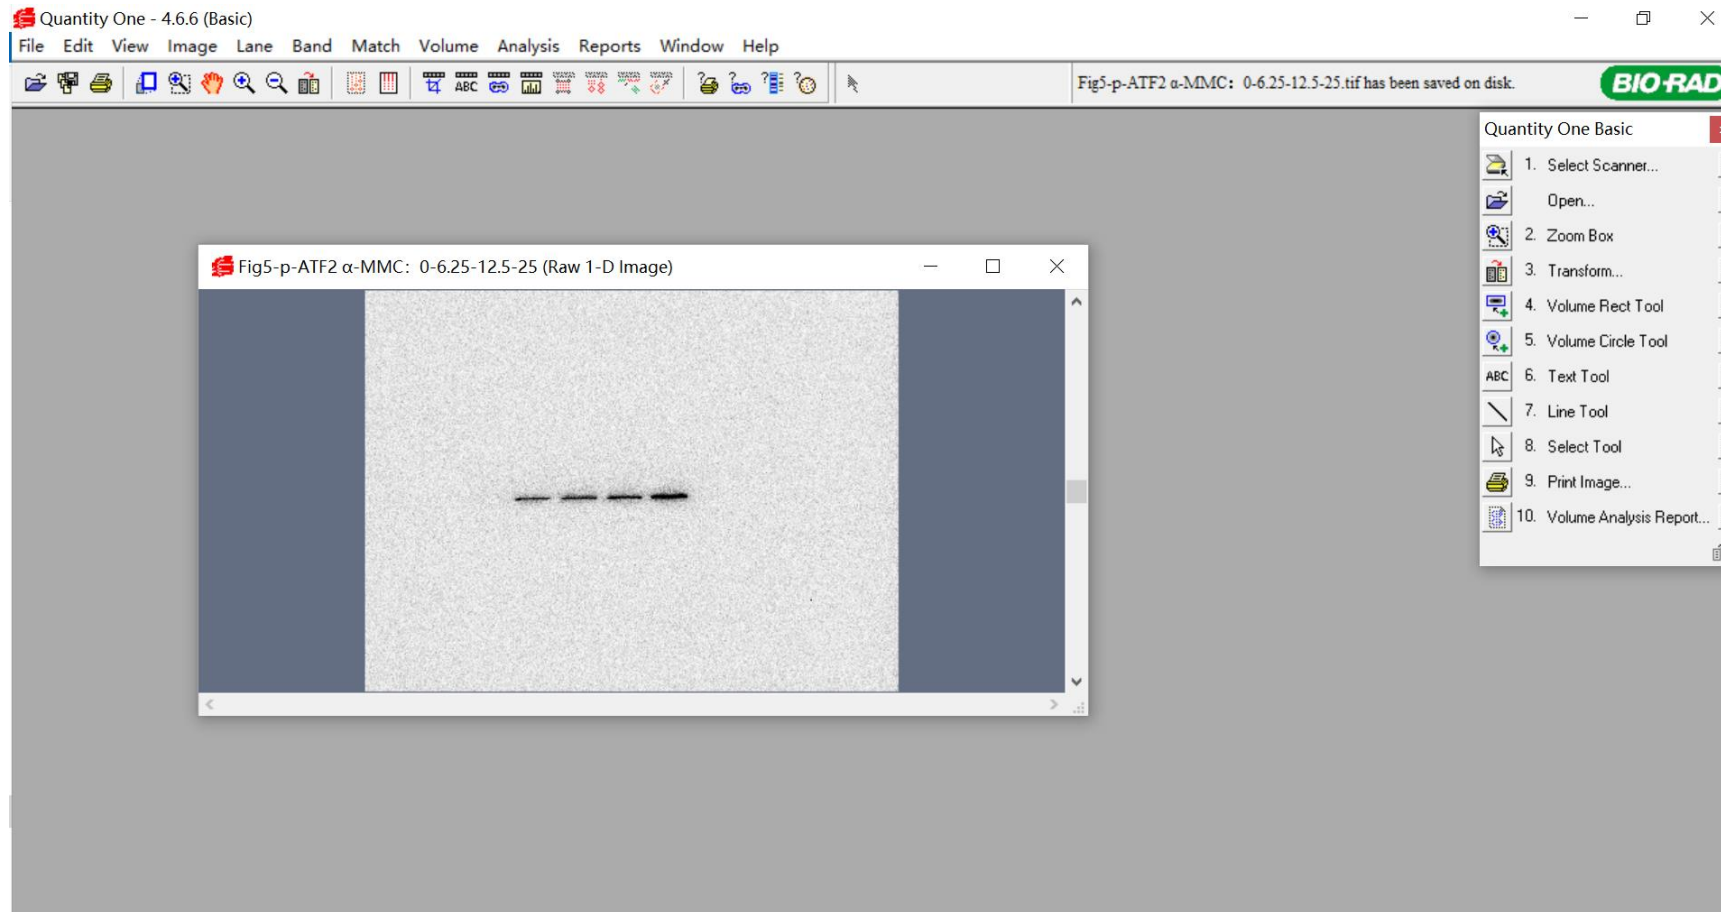

Fig5-p-c-Jun  $\alpha$ -MMC ( $\mu\text{g/mL}$ ) : 0-6.25-12.5-25-50

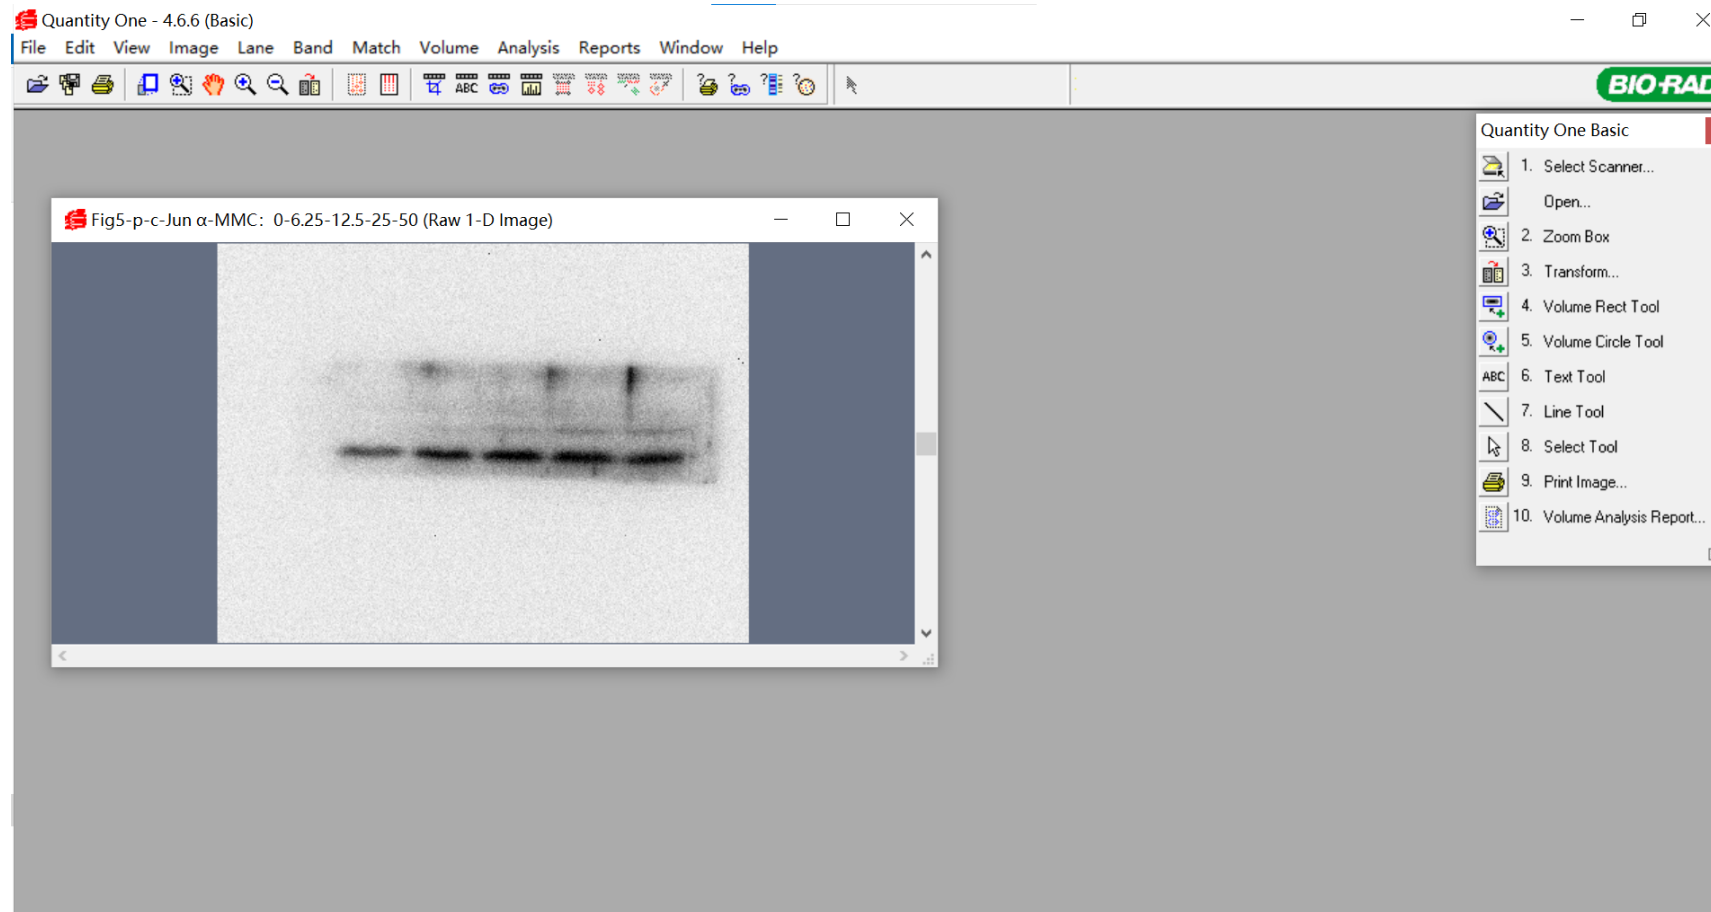

Fig5-p-c-Raf  $\alpha$ -MMC ( $\mu\text{g/mL}$ ) : 0-6.25-12.5-25

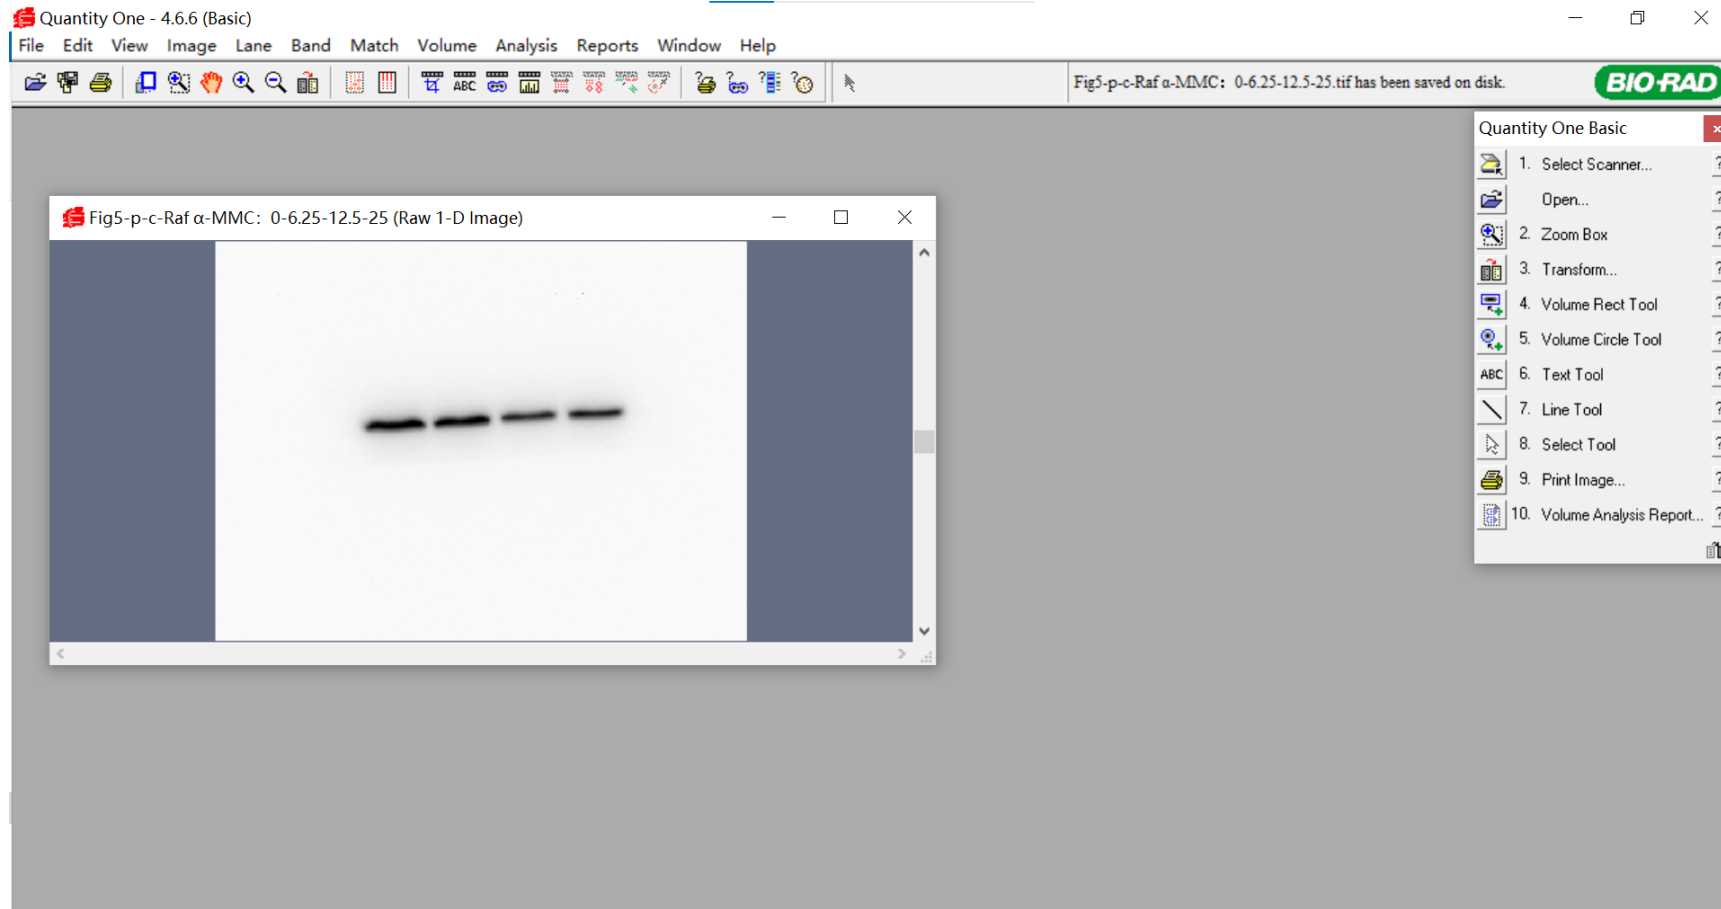



Fig5-p-ERK1/2  $\alpha$ -MMC ( $\mu\text{g/mL}$ ) : 0-6.25-12.5-25

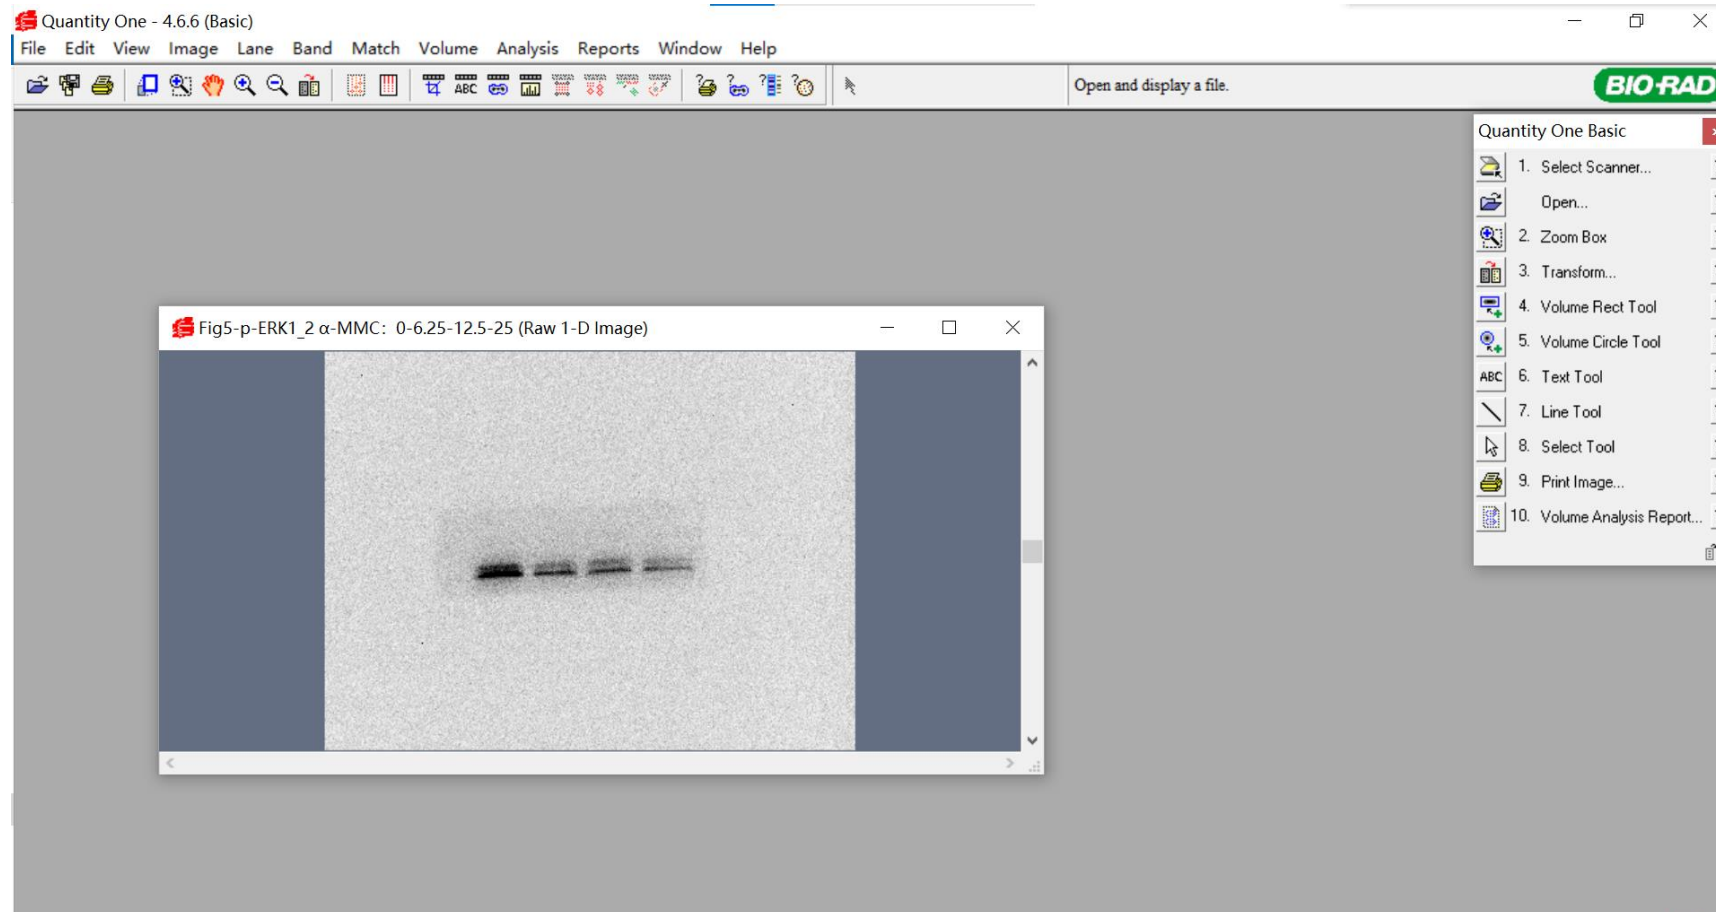

Fig5-p-MEK1\_2  $\alpha$ -MMC ( $\mu\text{g/mL}$ ) : 0-6.25-12.5-25

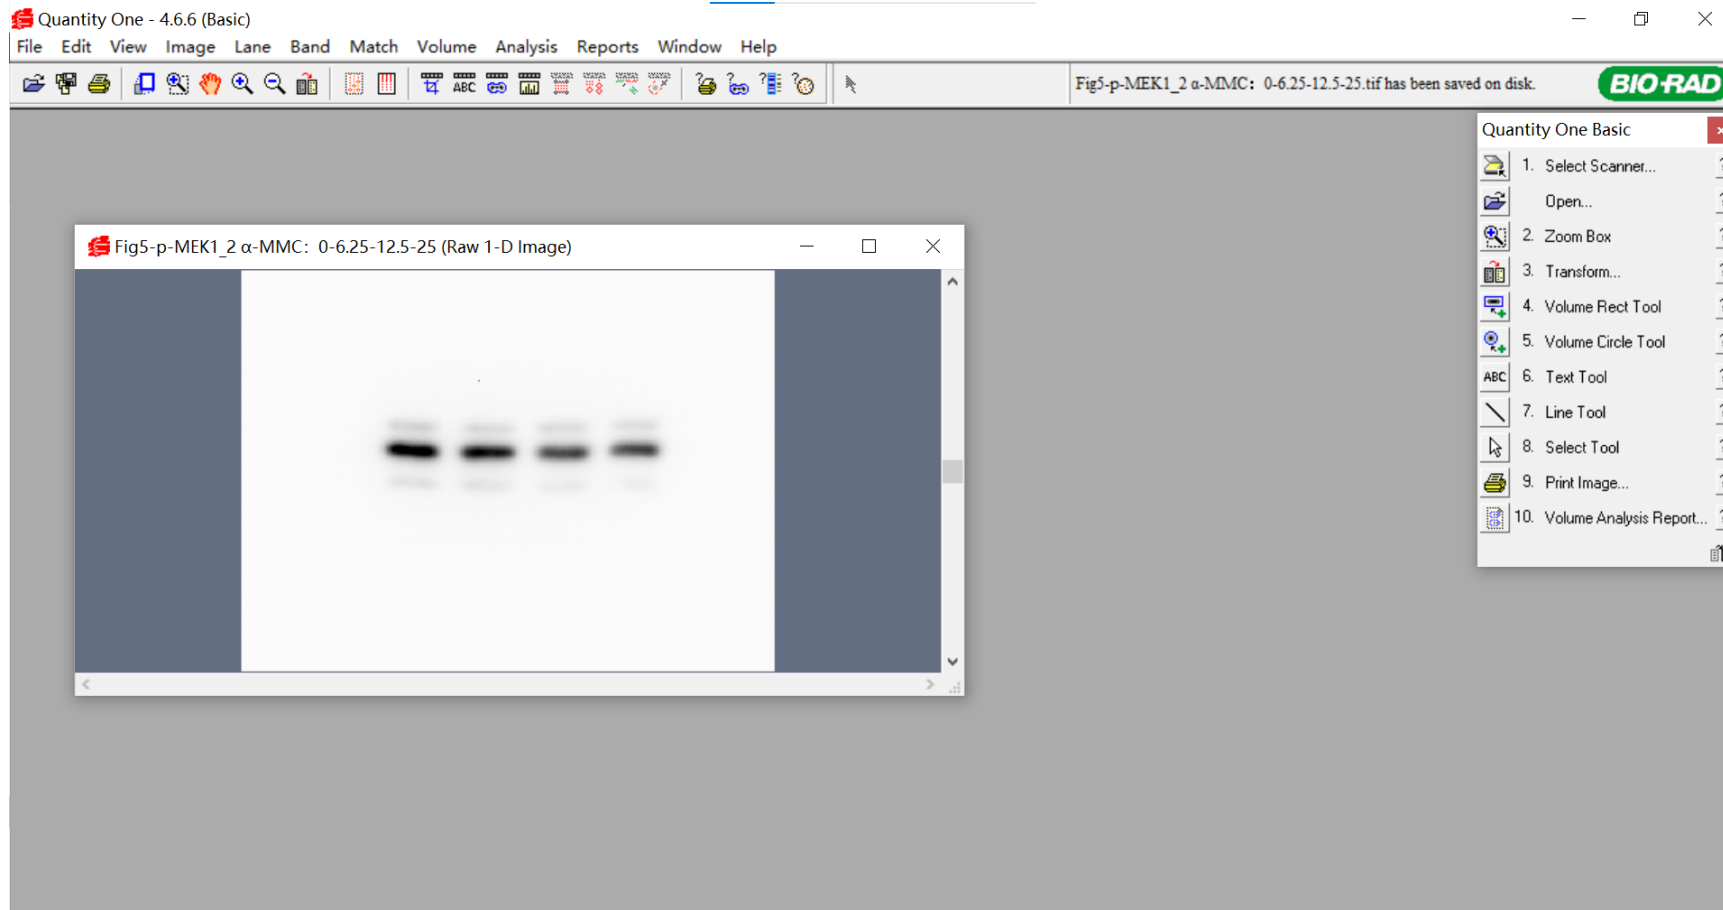

Fig5-p-MSK1  $\alpha$ -MMC ( $\mu\text{g/mL}$ ) : 0-6.25-12.5-25

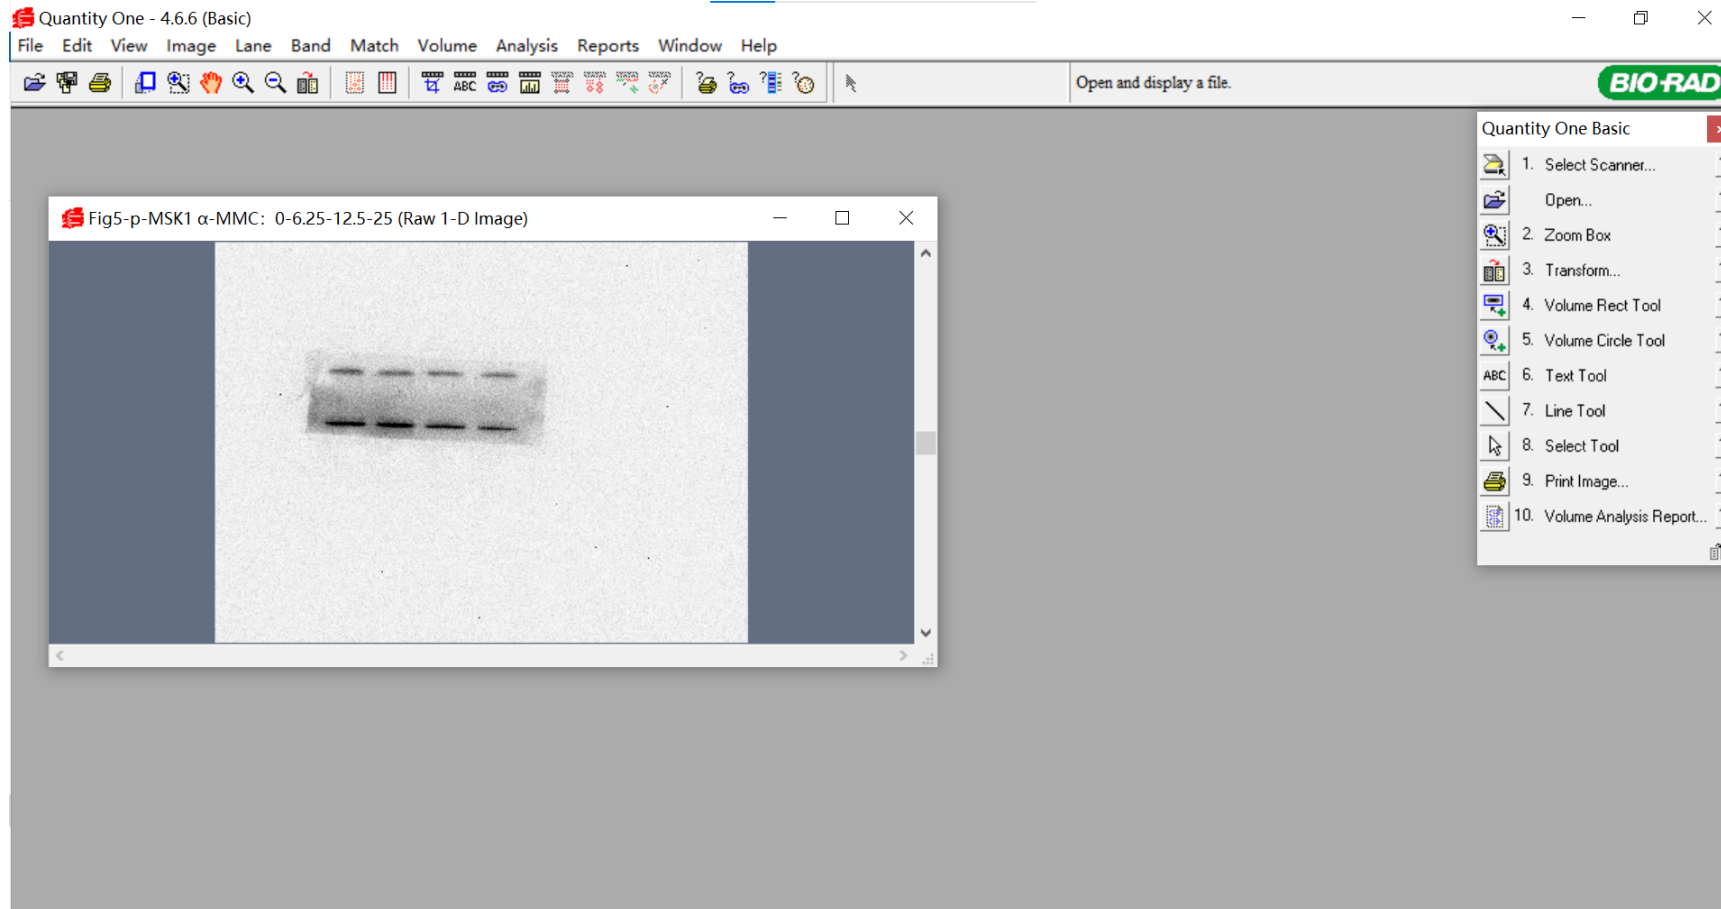

Fig5-p-p38  $\alpha$ -MMC ( $\mu\text{g/mL}$ ) : 0-6.25-12.5-25

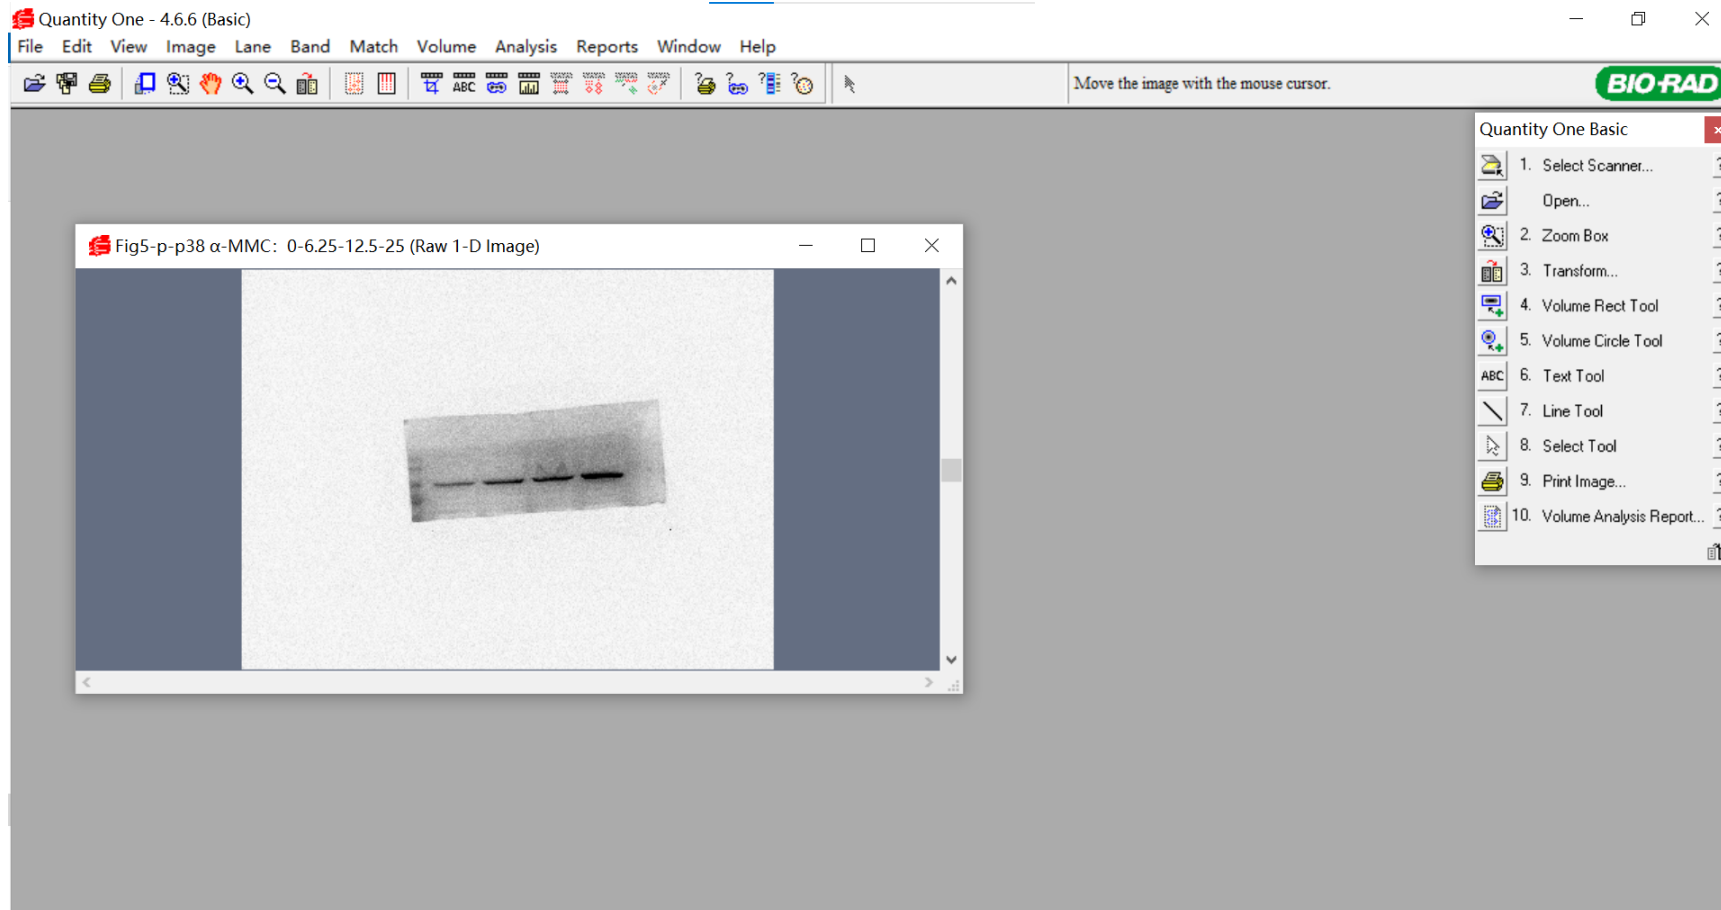

Fig5-p-P90RSK  $\alpha$ -MMC ( $\mu\text{g/mL}$ ) : 0-6.25-12.5-25

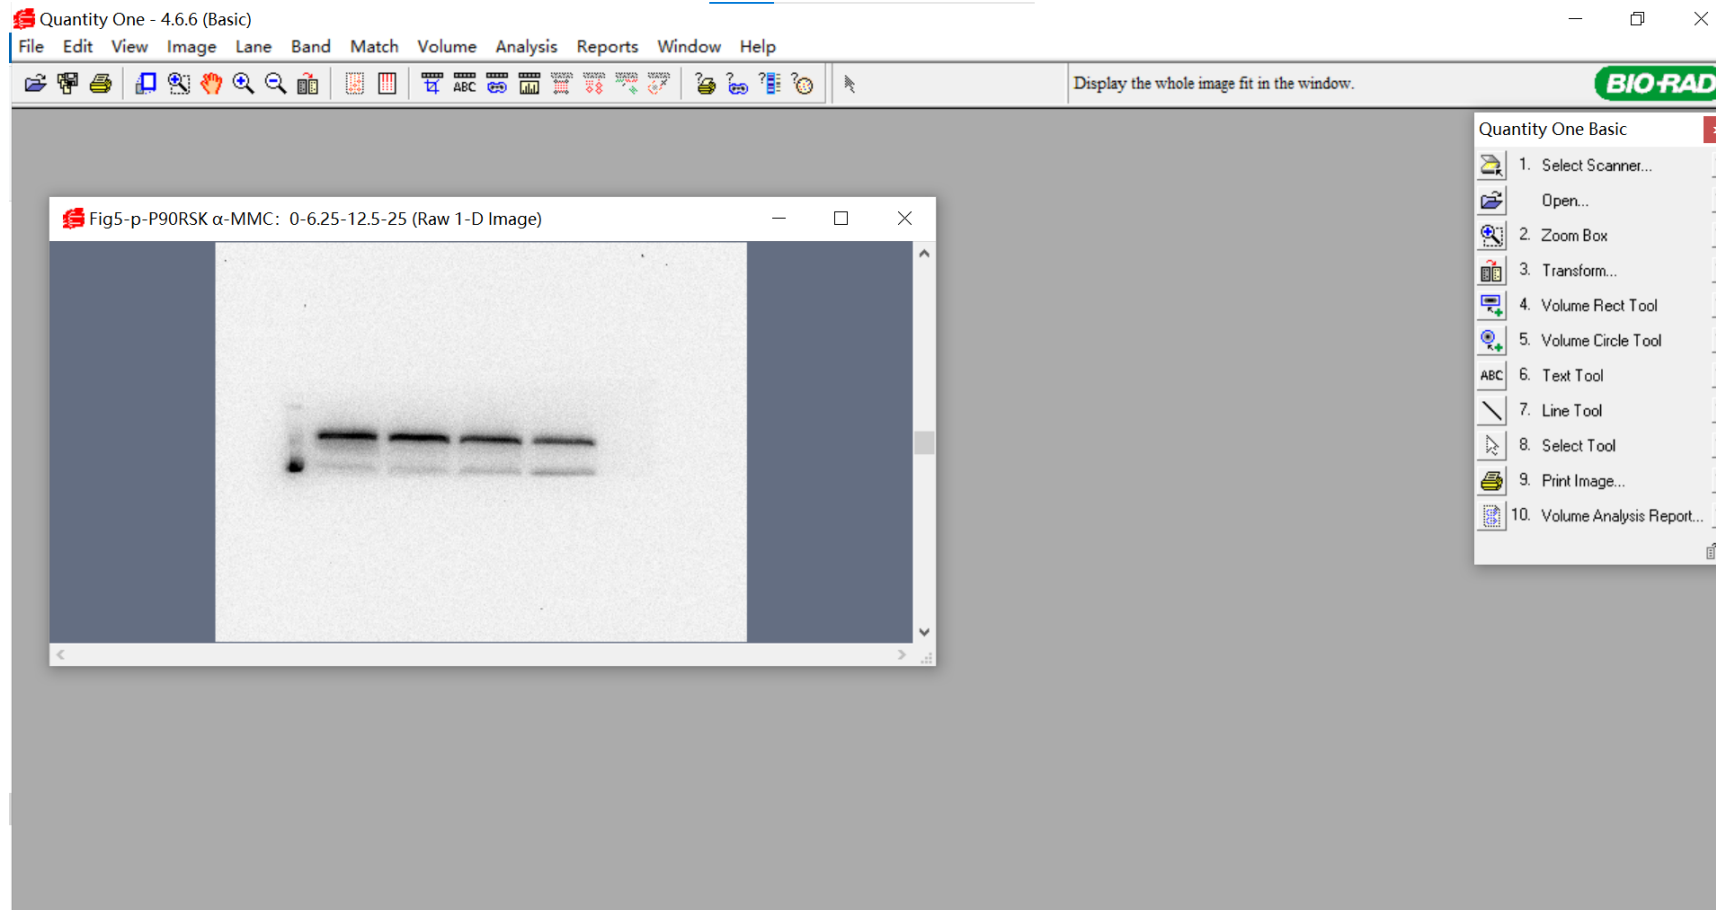

Fig5-p-SPAK\_JNK  $\alpha$ -MMC ( $\mu\text{g/mL}$ ) : 0-6.25-12.5-25

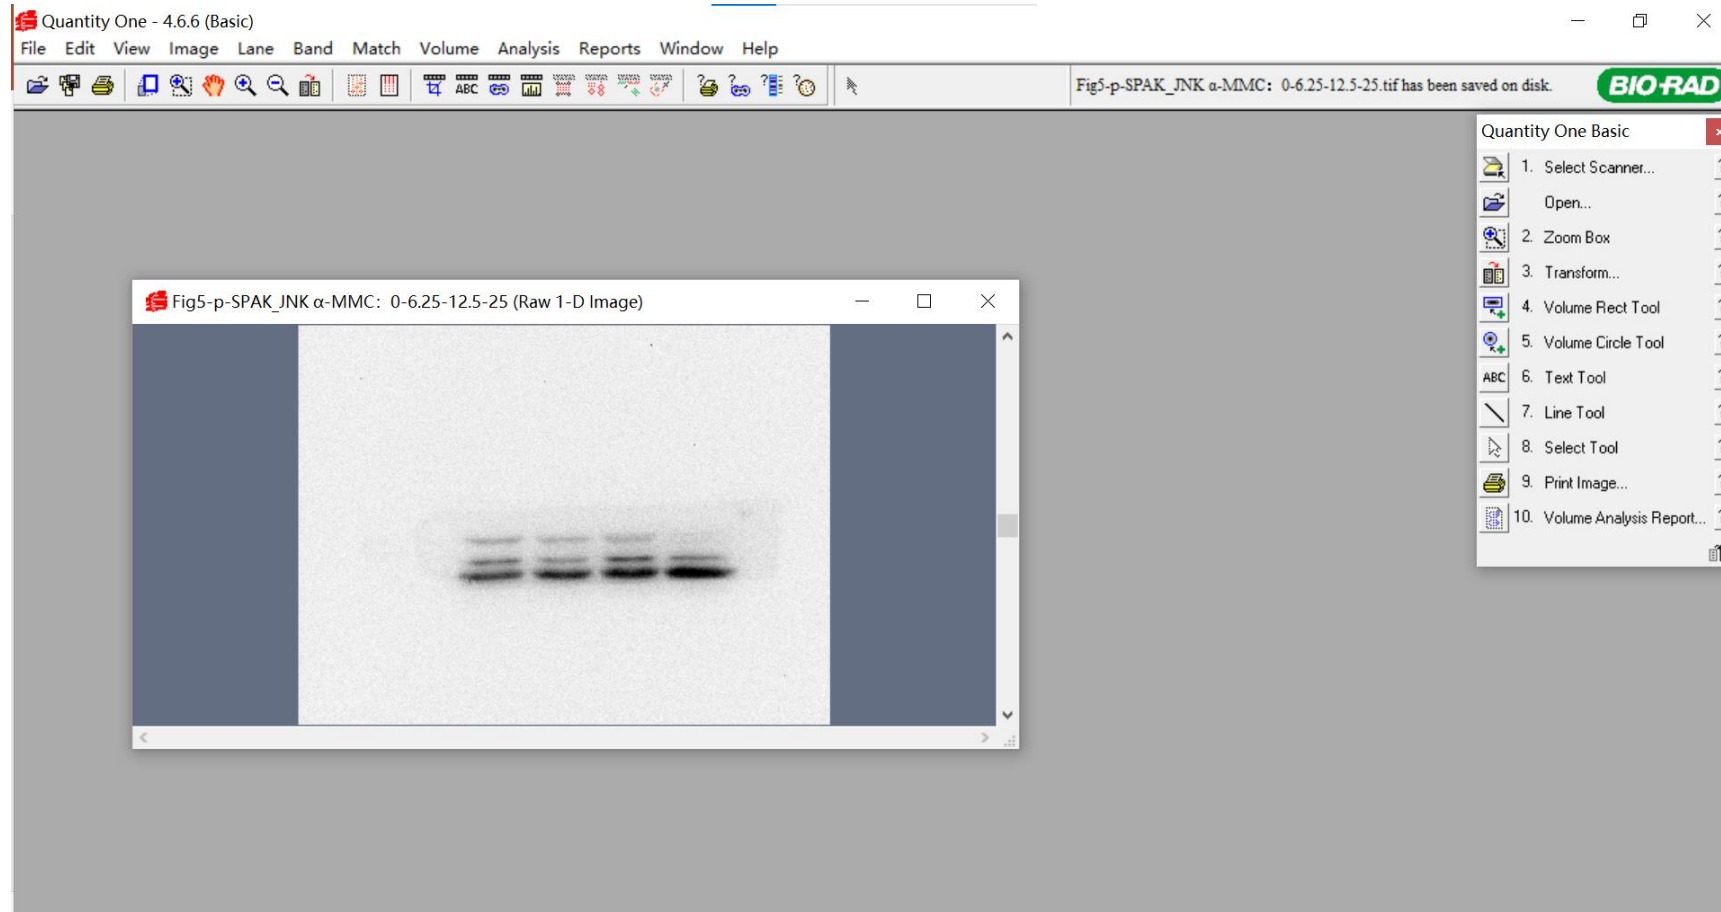

Supplement: s1 [file s1]
