# Supplementary material
Source: MDPI journal article supplement (https://www.mdpi.com/1424-8247/16/1/124)
Supplement: s1 [file s1]

# Report of $\alpha$ -MMC( $\mu\text{g/mL}$ )+MM.1S DW

Specimen Name:  $\alpha$ -MMC( $\mu\text{g/mL}$ )+MM.1S DW

Run Time: 2022/3/14 19:37

Cytometer: NovoCyte Quanteon 622181010270

Software: NovoExpress 1.4.0

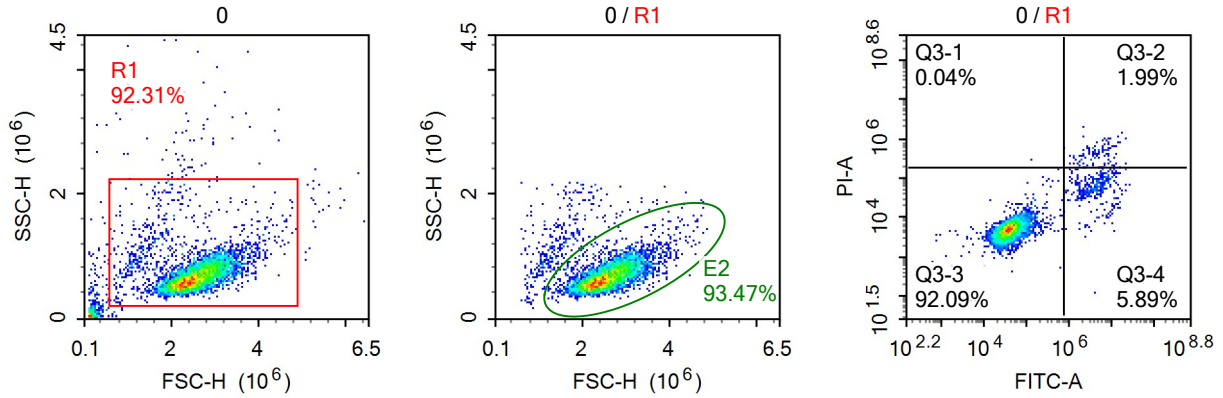

## Sample Statistics of 0

| Gate | Count | % Parent | X      | Y     | Median X  | Median Y |
|------|-------|----------|--------|-------|-----------|----------|
| All  | 5,722 |          |        |       |           |          |
| R1   | 5,282 | 92.31%   | FSC-H  | SSC-H | 2,509,583 | 654,008  |
| E2   | 4,937 | 93.47%   | FSC-H  | SSC-H | 2,543,310 | 640,792  |
| Q3-1 | 2     | 0.04%    | FITC-A | PI-A  | 424,916   | 443,592  |
| Q3-2 | 105   | 1.99%    | FITC-A | PI-A  | 4,648,527 | 439,044  |
| Q3-3 | 4,864 | 92.09%   | FITC-A | PI-A  | 36,204    | 4,975    |
| Q3-4 | 311   | 5.89%    | FITC-A | PI-A  | 4,354,817 | 58,561   |

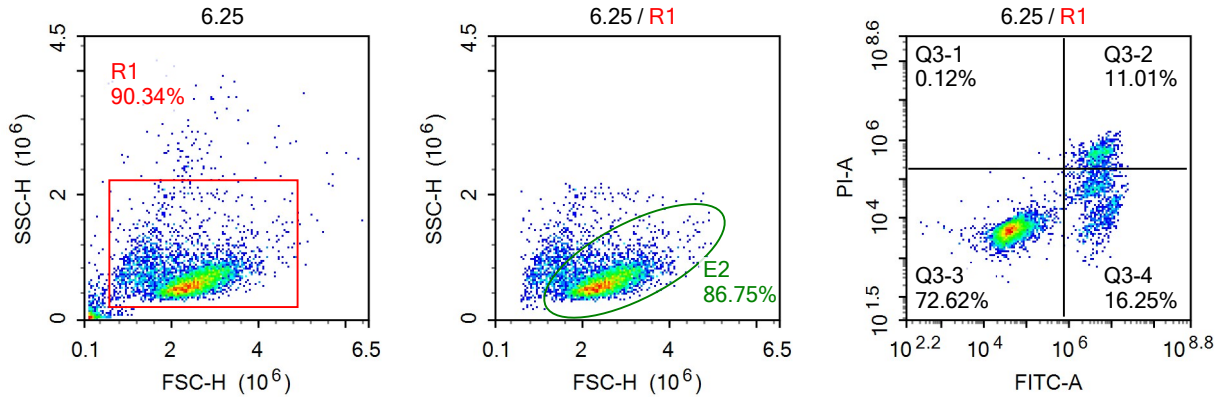

# Sample Statistics of 6.25

| Gate | Count | % Parent | X      | Y     | Median X  | Median Y |
|------|-------|----------|--------|-------|-----------|----------|
| All  | 6,213 |          |        |       |           |          |
| R1   | 5,613 | 90.34%   | FSC-H  | SSC-H | 2,395,605 | 607,461  |
| E2   | 4,869 | 86.75%   | FSC-H  | SSC-H | 2,481,630 | 582,859  |
| Q3-1 | 7     | 0.12%    | FITC-A | PI-A  | 687,487   | 373,024  |
| Q3-2 | 618   | 11.01%   | FITC-A | PI-A  | 4,797,816 | 460,641  |
| Q3-3 | 4,076 | 72.62%   | FITC-A | PI-A  | 39,409    | 5,175    |
| Q3-4 | 912   | 16.25%   | FITC-A | PI-A  | 4,575,498 | 36,776   |

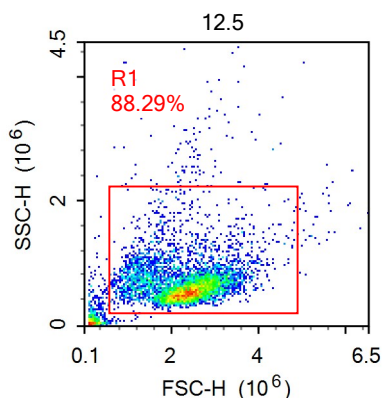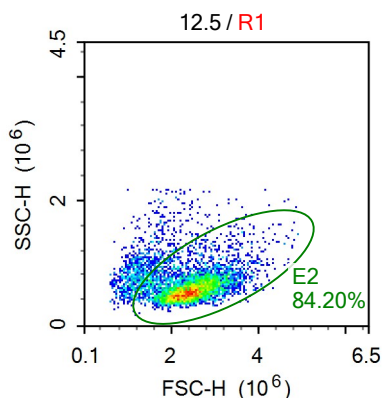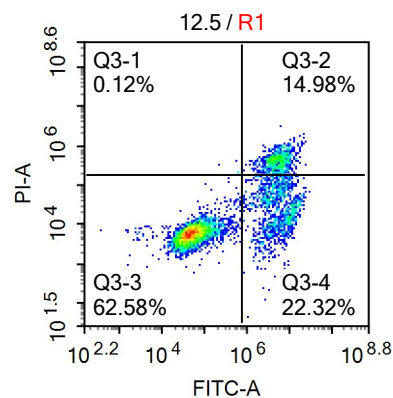

# Sample Statistics of 12.5

| Gate | Count | % Parent | X      | Y     | Median X  | Median Y |
|------|-------|----------|--------|-------|-----------|----------|
| All  | 6,501 |          |        |       |           |          |
| R1   | 5,740 | 88.29%   | FSC-H  | SSC-H | 2,355,941 | 597,902  |
| E2   | 4,833 | 84.20%   | FSC-H  | SSC-H | 2,451,786 | 567,484  |
| Q3-1 | 7     | 0.12%    | FITC-A | PI-A  | 566,383   | 253,630  |
| Q3-2 | 860   | 14.98%   | FITC-A | PI-A  | 5,196,987 | 440,036  |
| Q3-3 | 3,592 | 62.58%   | FITC-A | PI-A  | 46,367    | 5,994    |
| Q3-4 | 1,281 | 22.32%   | FITC-A | PI-A  | 5,150,986 | 28,843   |

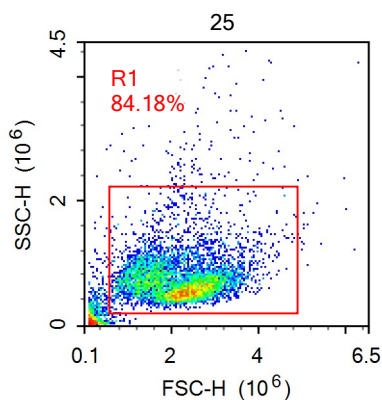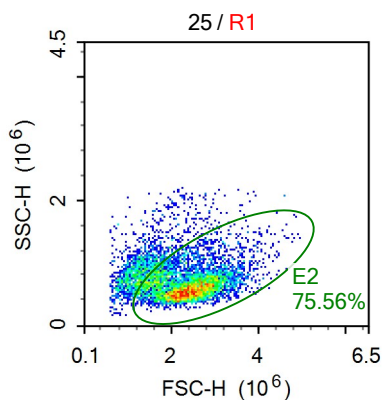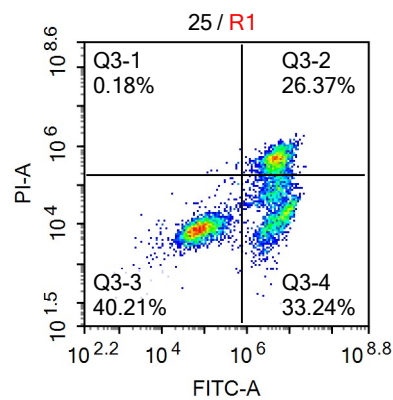

Sample Statistics of 25

| Gate     | Count | % Parent | X      | Y     | Median X  | Median Y |
|----------|-------|----------|--------|-------|-----------|----------|
| All      | 7,451 |          |        |       |           |          |
| └ R1     | 6,272 | 84.18%   | FSC-H  | SSC-H | 2,208,089 | 665,919  |
| └┐ E2    | 4,739 | 75.56%   | FSC-H  | SSC-H | 2,413,784 | 616,906  |
| └┐┐ Q3-1 | 11    | 0.18%    | FITC-A | PI-A  | 521,723   | 308,649  |
| └┐┐ Q3-2 | 1,654 | 26.37%   | FITC-A | PI-A  | 4,807,298 | 458,835  |
| └┐┐ Q3-3 | 2,522 | 40.21%   | FITC-A | PI-A  | 70,945    | 7,577    |
| └┐┐ Q3-4 | 2,085 | 33.24%   | FITC-A | PI-A  | 4,734,268 | 24,892   |
