# Supplementary material
Source: MDPI journal article supplement (https://www.mdpi.com/1424-8247/16/1/124)
Supplement: s1 [file s1]

# Report of $\alpha$ -MMC( $\mu\text{g/mL}$ )+MM.1S MMP

Specimen Name:  $\alpha$ -MMC( $\mu\text{g/mL}$ )+MM.1S MMP

Run Time: 2022/8/4 15:30

Cytometer: NovoCyte Quanteon 622181010270

Software: NovoExpress 1.4.0

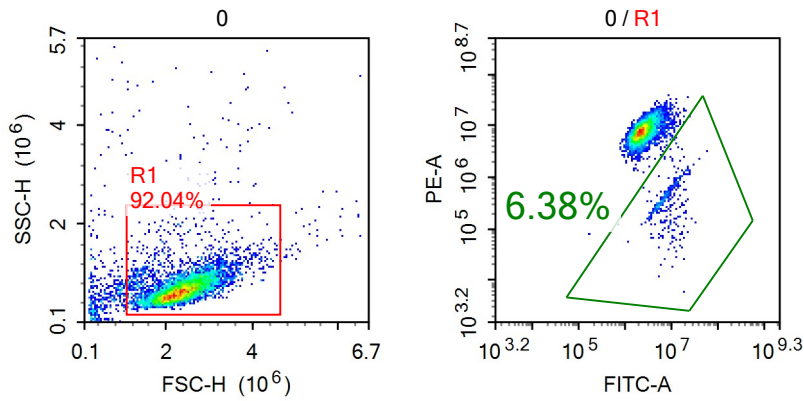

## Sample Statistics of 0

| Gate  | Count | % Parent | X      | Y     | Median X  | Median Y |
|-------|-------|----------|--------|-------|-----------|----------|
| All   | 6,408 |          |        |       |           |          |
| └ R1  | 5,898 | 92.04%   | FSC-H  | SSC-H | 2,315,401 | 670,170  |
| └└ P2 | 376   | 6.38%    | FITC-A | PE-A  | 7,686,580 | 339,277  |

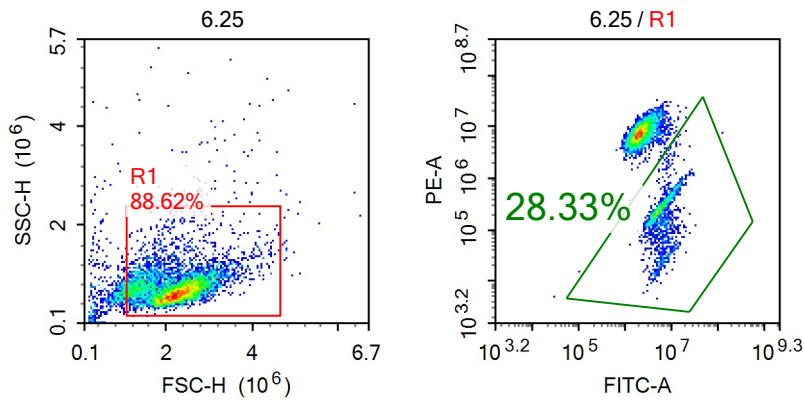

## Sample Statistics of 6.25

| Gate  | Count | % Parent | X      | Y     | Median X  | Median Y |
|-------|-------|----------|--------|-------|-----------|----------|
| All   | 6,589 |          |        |       |           |          |
| └ R1  | 5,839 | 88.62%   | FSC-H  | SSC-H | 2,204,367 | 704,390  |
| └└ P2 | 1,654 | 28.33%   | FITC-A | PE-A  | 5,723,024 | 208,501  |

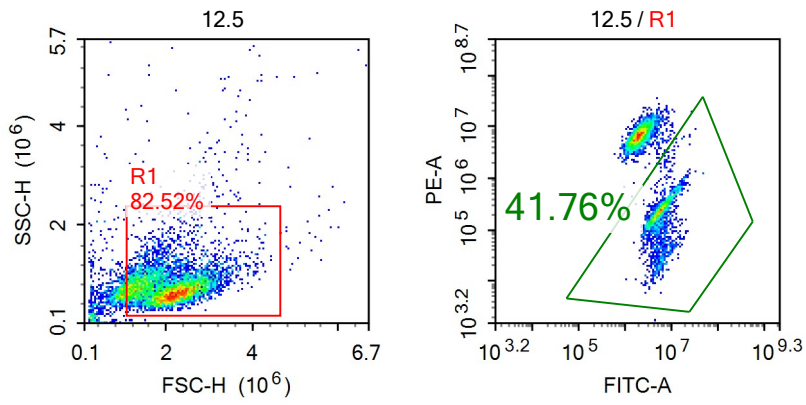

Sample Statistics of 12.5

| Gate | Count | % Parent | X      | Y     | Median X  | Median Y |
|------|-------|----------|--------|-------|-----------|----------|
| All  | 6,901 |          |        |       |           |          |
| └ R1 | 5,695 | 82.52%   | FSC-H  | SSC-H | 2,063,356 | 732,805  |
| └ P2 | 2,378 | 41.76%   | FITC-A | PE-A  | 5,462,342 | 199,063  |

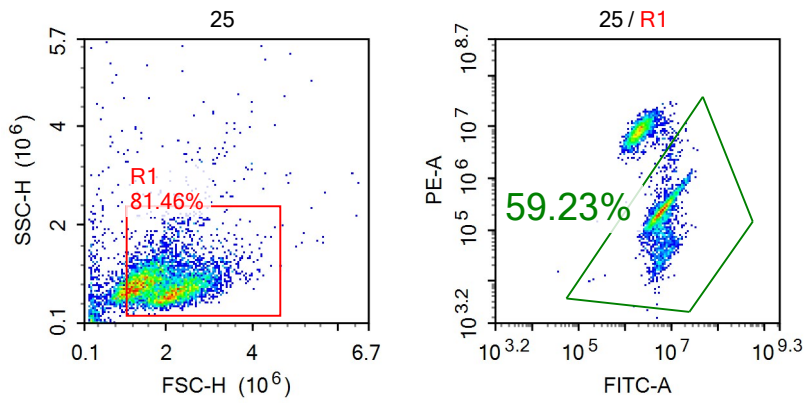

Sample Statistics of 25

| Gate | Count | % Parent | X      | Y     | Median X  | Median Y |
|------|-------|----------|--------|-------|-----------|----------|
| All  | 6,926 |          |        |       |           |          |
| └ R1 | 5,642 | 81.46%   | FSC-H  | SSC-H | 1,889,254 | 793,813  |
| └ P2 | 3,342 | 59.23%   | FITC-A | PE-A  | 5,880,032 | 205,434  |
