# Supplementary material
Source: MDPI journal article supplement (https://www.mdpi.com/1424-8247/16/1/124)
Supplement: s1 [file s1]

# Report of $\alpha$ -MMC( $\mu\text{g/mL}$ )+MM.1S ZQ

Specimen Name:  $\alpha$ -MMC( $\mu\text{g/mL}$ )+MM.1S ZQ

Run Time: 2022/10/12 10:37

Cytometer: NovoCyte Quanteon 622181010270

Software: NovoExpress 1.4.0

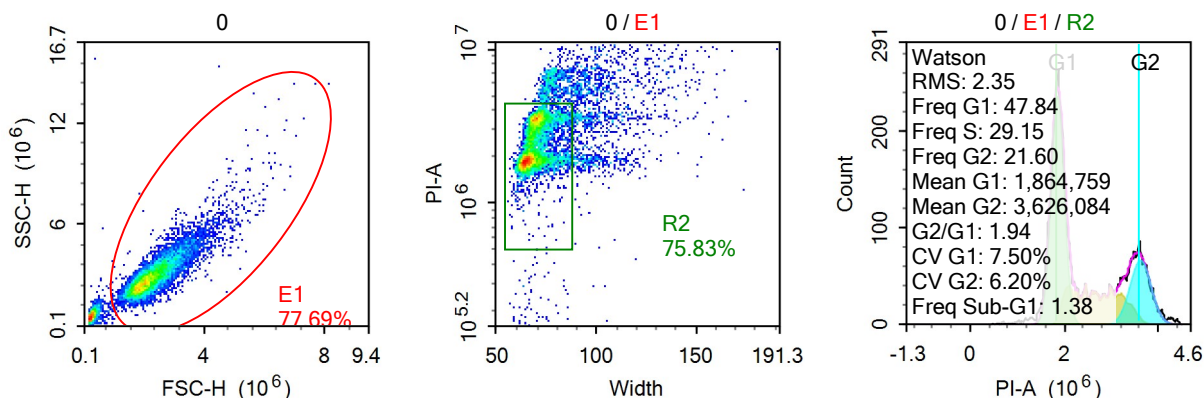

## Sample Statistics of 0

| Gate | Count  | % Parent | X     | Y     | Median X  | Median Y  |
|------|--------|----------|-------|-------|-----------|-----------|
| All  | 12,871 |          |       |       |           |           |
| E1   | 10,000 | 77.69%   | FSC-H | SSC-H | 2,250,760 | 2,831,502 |
| R2   | 7,583  | 75.83%   | Width | PI-A  | 68        | 2,092,946 |

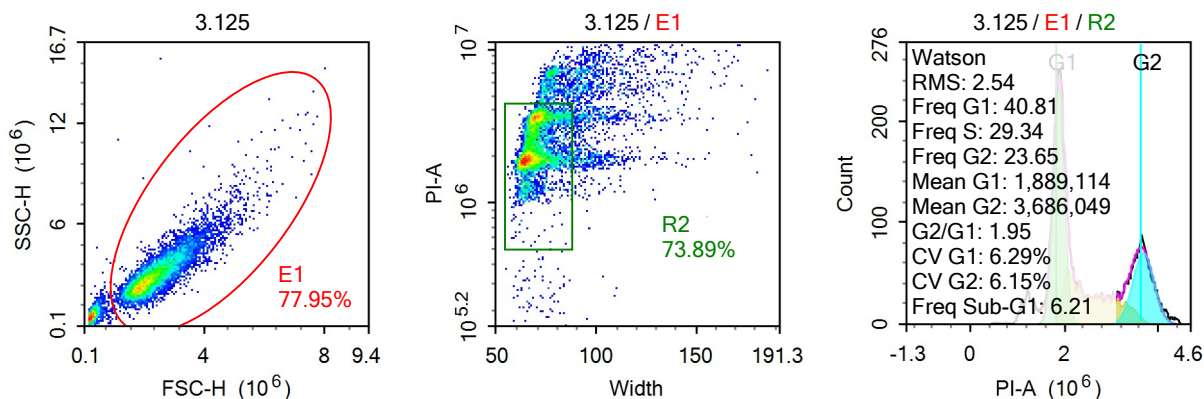

## Sample Statistics of 3.125

| Gate | Count  | % Parent | X     | Y     | Median X  | Median Y  |
|------|--------|----------|-------|-------|-----------|-----------|
| All  | 12,828 |          |       |       |           |           |
| E1   | 10,000 | 77.95%   | FSC-H | SSC-H | 2,253,617 | 2,810,742 |
| R2   | 7,389  | 73.89%   | Width | PI-A  | 68        | 2,096,676 |

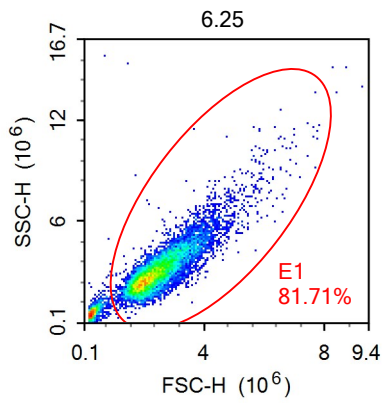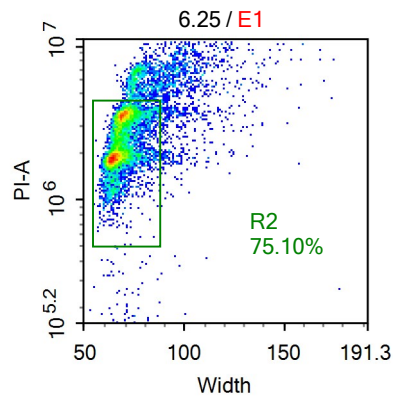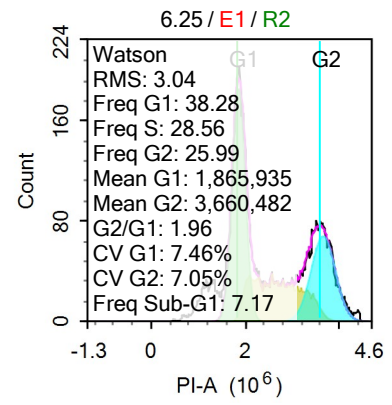

Sample Statistics of 6.25

| Gate | Count  | % Parent | X     | Y     | Median X  | Median Y  |
|------|--------|----------|-------|-------|-----------|-----------|
| All  | 12,239 |          |       |       |           |           |
| E1   | 10,000 | 81.71%   | FSC-H | SSC-H | 2,362,509 | 2,874,632 |
| R2   | 7,510  | 75.10%   | Width | PI-A  | 67        | 2,155,898 |

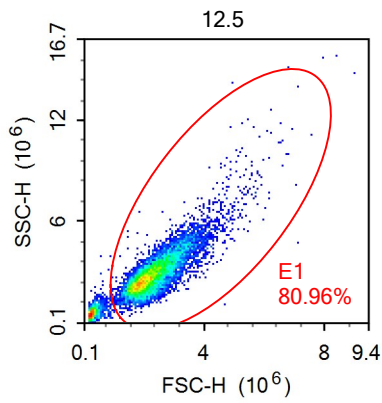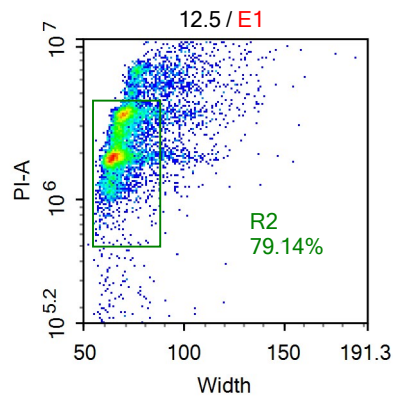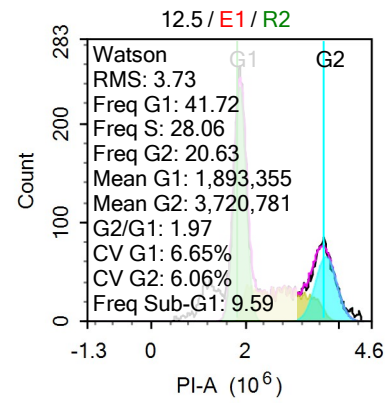

Sample Statistics of 12.5

| Gate | Count  | % Parent | X     | Y     | Median X  | Median Y  |
|------|--------|----------|-------|-------|-----------|-----------|
| All  | 12,352 |          |       |       |           |           |
| E1   | 10,000 | 80.96%   | FSC-H | SSC-H | 2,246,043 | 2,729,576 |
| R2   | 7,914  | 79.14%   | Width | PI-A  | 67        | 2,050,537 |
