# Supplementary material
Source: MDPI journal article supplement (https://www.mdpi.com/1424-8247/16/1/124)

0  $\alpha$ -MMC  $\mu\text{g/mL}$

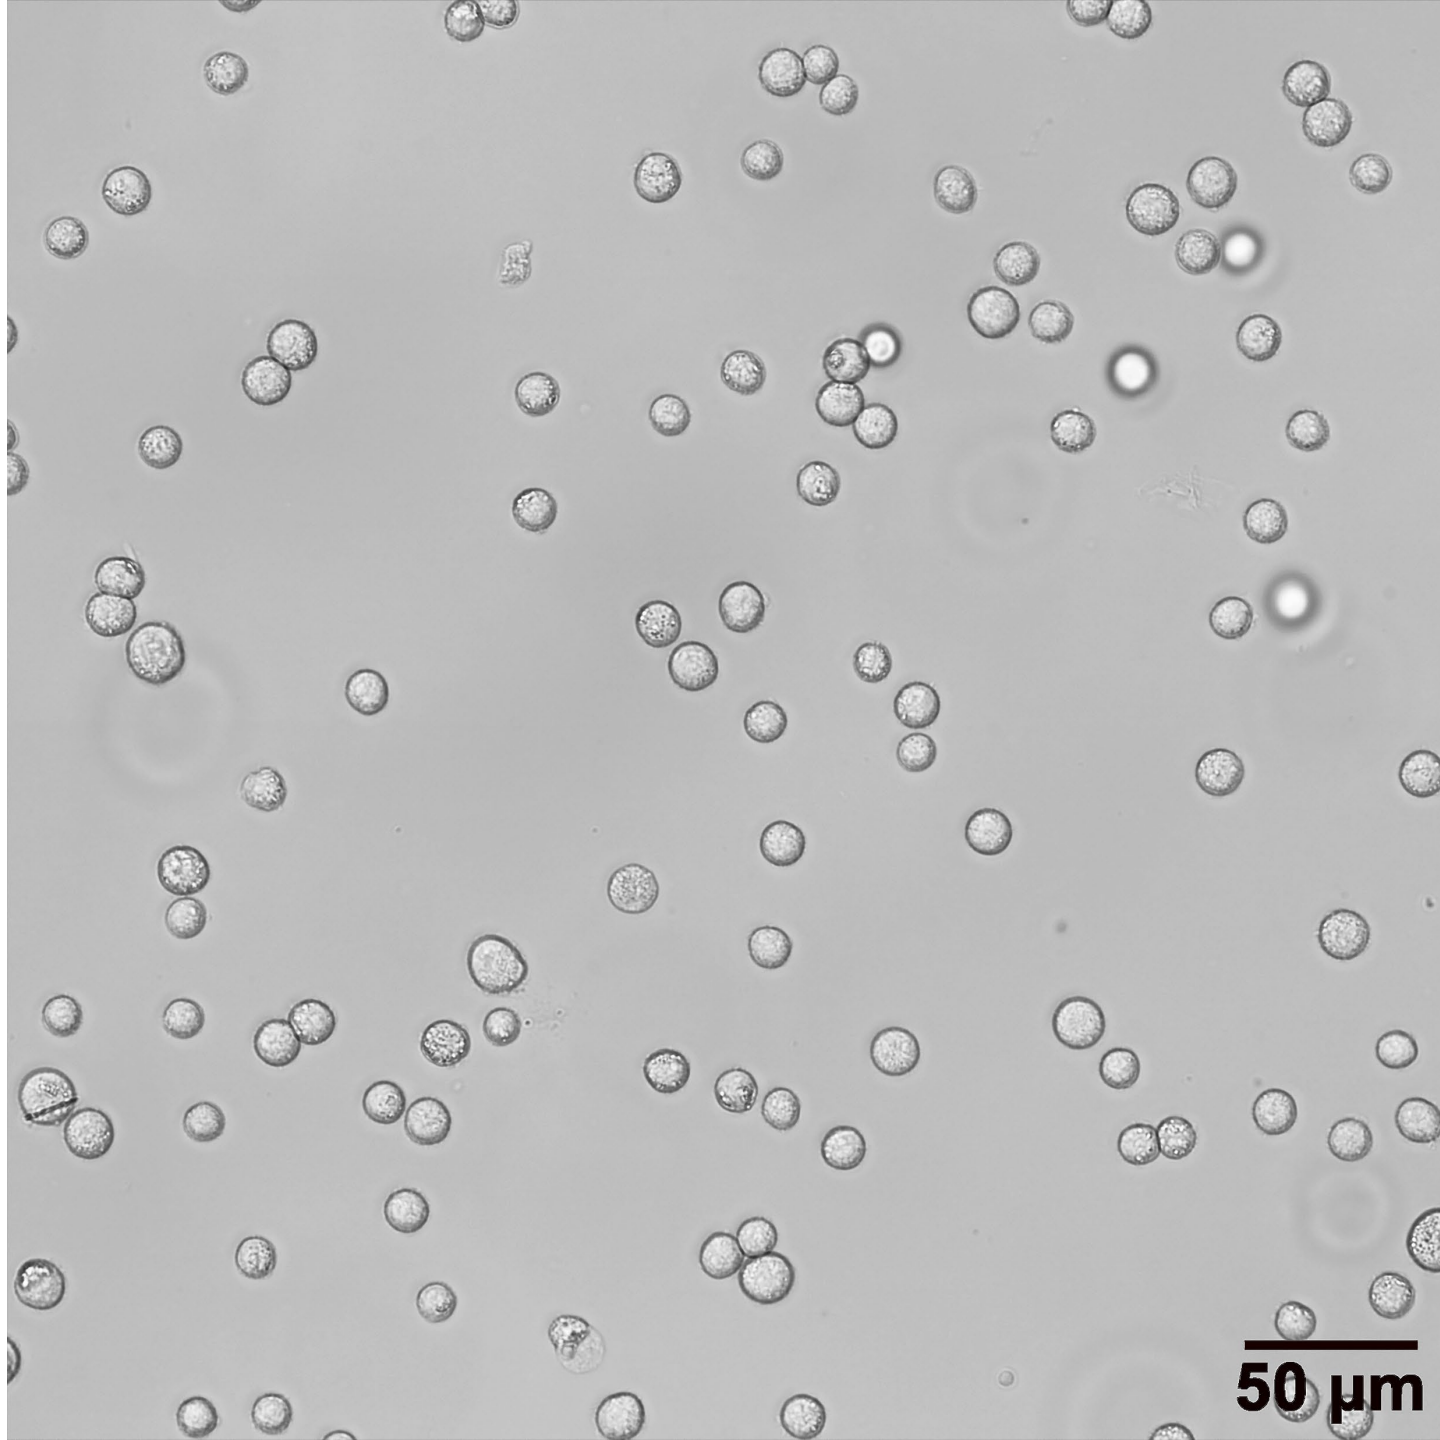

12.5  $\alpha$ -MMC  $\mu\text{g/mL}$

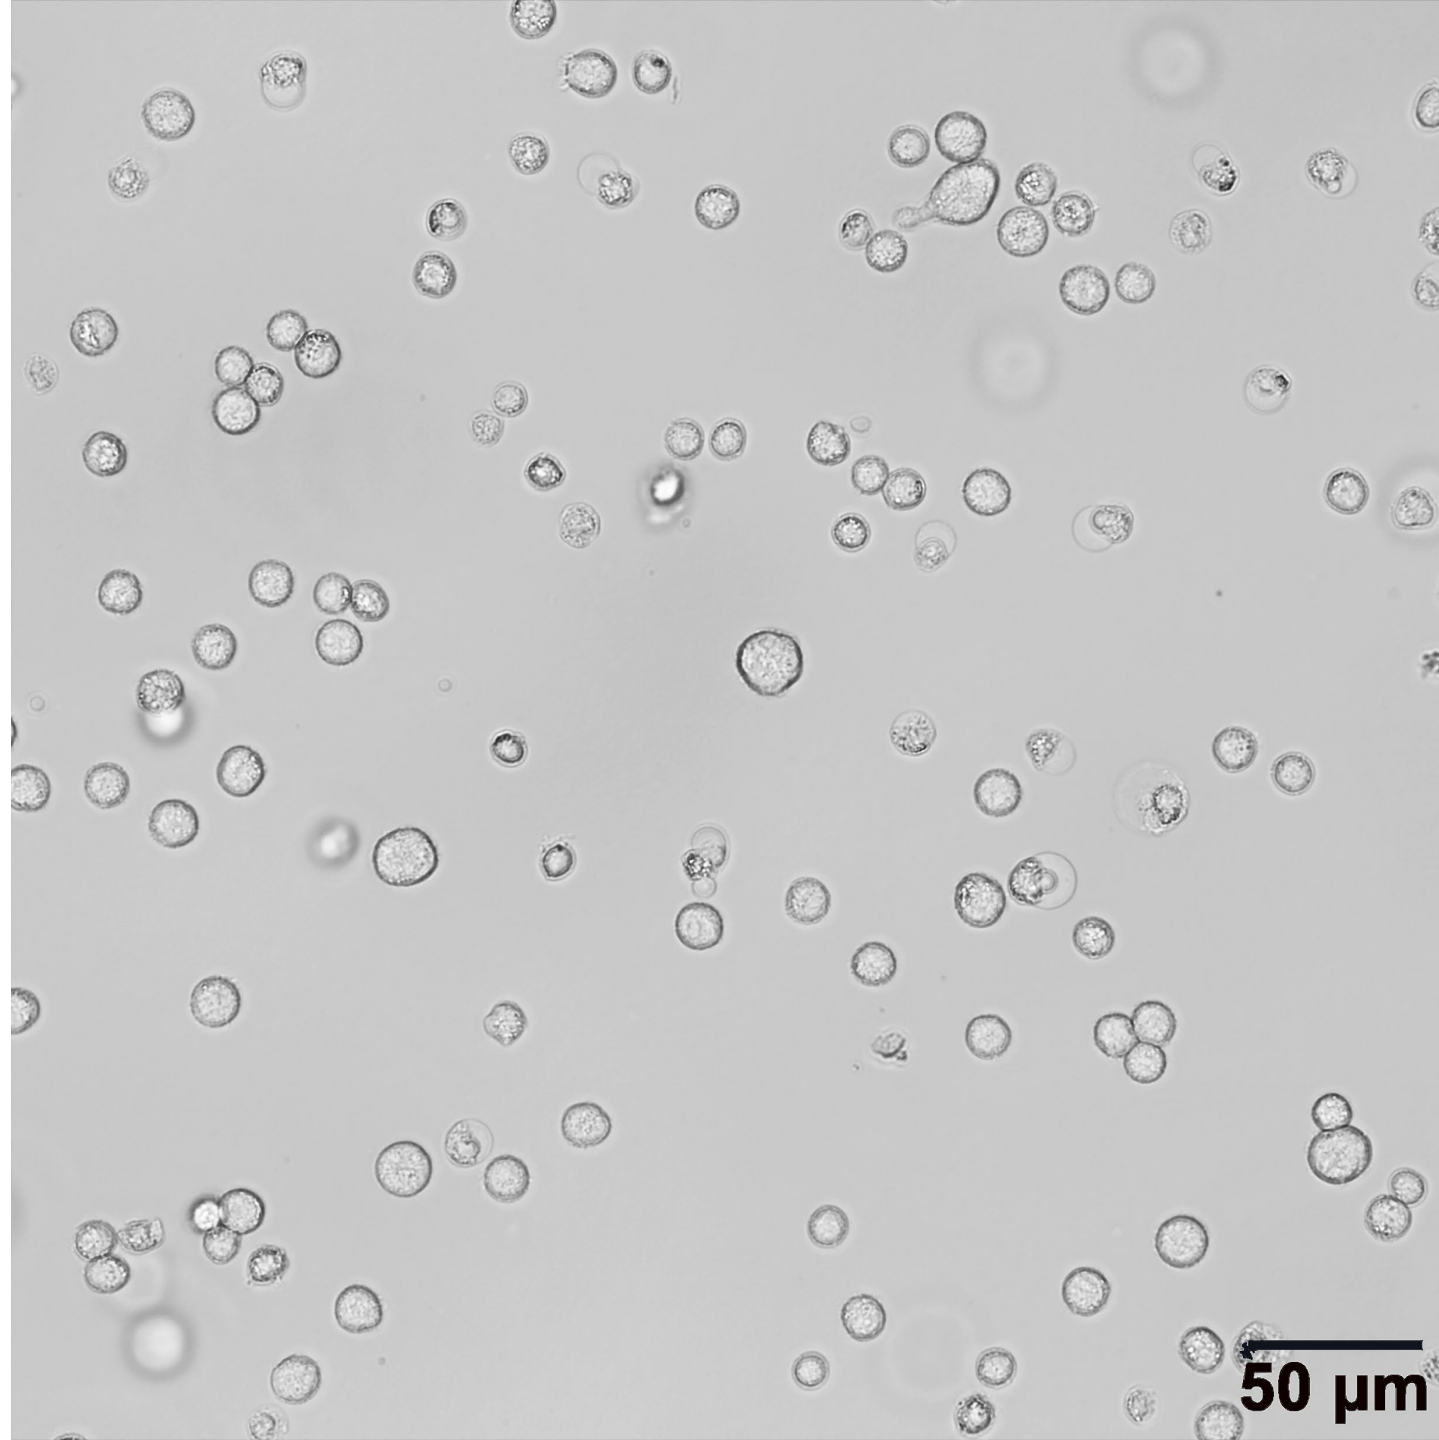

25  $\alpha$ -MMC  $\mu\text{g/mL}$

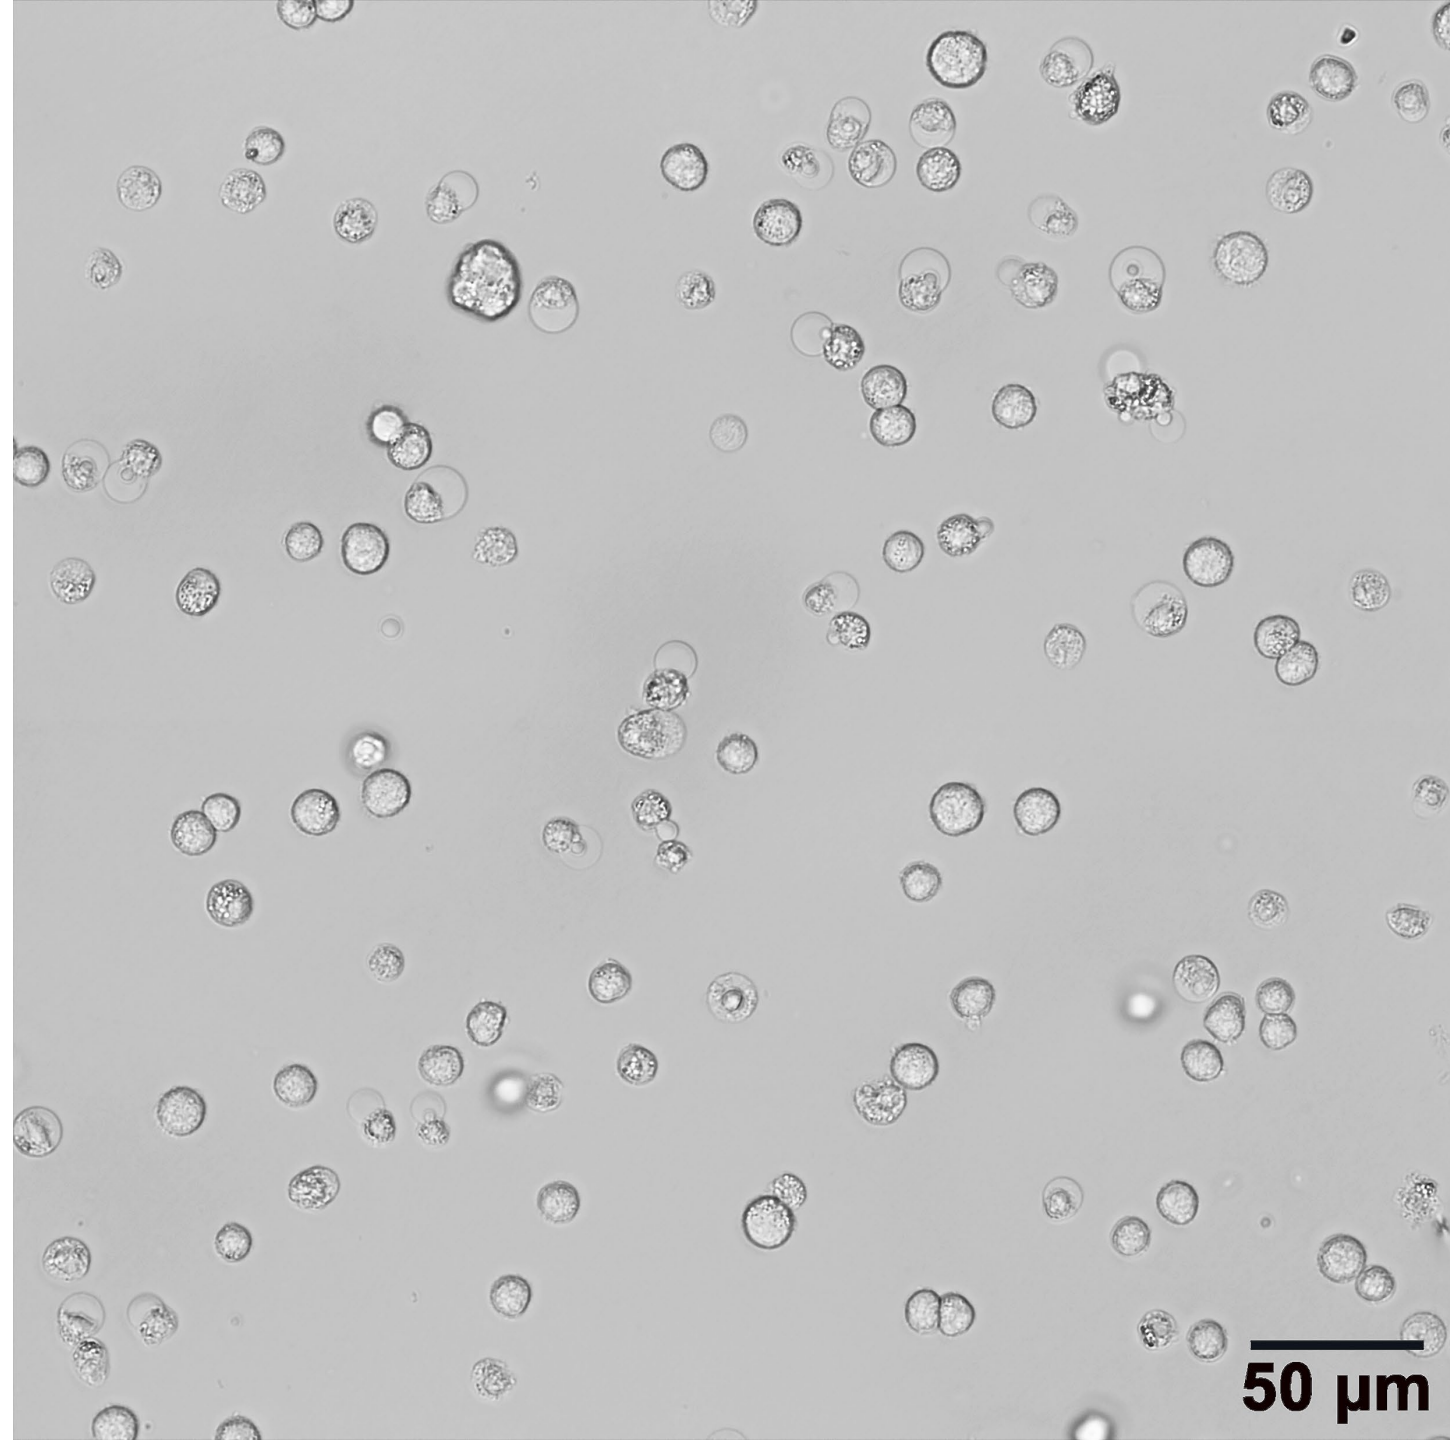

Supplement: s1 [file s1]
